# Supplementary material
Source: publisher figshare collection journal article supplement (https://diabetesjournals.figshare.com/articles/dataset/_/17836400)
Supplement: Supplementary file 1 [file 1]

## Sheet: Sheet1
		1	Production of nitric oxide and reactive oxygen species
		2	Cardiac β-adrenergic Signaling
		3	Oxidative Phosphorylation
		4	EIF2 Signaling
		5	ERK/MAPK Signaling
		6	RhoGDI Signaling
		7	CDK5 Signaling
		8	PTEN Signaling
		9	Signaling by Rho Family GTPases
		10	D-myo-inositol-5-phosphate Metabolism
		11	D-myo-inositol (1,4,5,6)-Tetrakisphosphate Biosynthesis
		12	D-myo-inositol (3,4,5,6)-Tetrakisphosphate Biosynthesis
		13	Dopamine-DARPP32 Feedback in cAMP signaling
		14	Superpathway of Inositol Phosphate Compounds
		15	Fcγ Receptor-mediated Phagocytosis in Macrophages and Monocytes
		16	3-phosphoinositide Biosynthesis
		17	3-phosphoinositide Degradation
		18	Apoptosis Signaling
		19	Ephrin Receptor Signaling
		20	NER Pathway
		21	NF-ΚB Signaling
		22	GP6 Signaling Pathway
		23	UVC-Induced MAPK Signaling
		24	Synaptogenesis Signaling Pathway
		25	Neuropathic Pain Signaling In Dorsal Horn
		26	PI3K/AKT Signaling
		27	mTOR Signaling
		28	Protein Kinase A Signaling
		29	Renin-Angiotensin Signaling
		30	G⍺12/13 Signaling
		31	Gluconeogenesis I
		32	Glycolysis I
		33	Stearate BiosynthesisI (Animal)
		34	Fatty Acid β-oxidation I
		35	Retinoic Acid Mediated Apoptosis Signaling
		36	Tec Kinase Signaling
		37	UVA-Induced MAPK Signaling
		38	Sumolaytion Pathway
		39	FAT10 Cancer Signaling Pathway
		40	VDR/RXR Activation
		41	Mitotic Roles of Polo-Like Kinases
		42	Tumoricidal Function of Hepatic Natural Killer Cells
