# Supplementary material
Source: publisher figshare collection journal article supplement (https://diabetesjournals.figshare.com/articles/dataset/_/17836400)
Supplement: Supplementary file 2 [file 1]

## Online appendix - Supplemental Information

### Spatial Environment Affects *HNF4A* Mutation-Specific Proteome Signatures and Cellular Morphology in hiPSC-Derived $\beta$ -Like Cells

Manuel Carrasco<sup>1,2\*</sup> Chencheng Wang<sup>3,4\*</sup>, Anne M. Søviknes<sup>1\*</sup>, Yngvild Bjørlykke<sup>1,5\*</sup>, Shadab Abadpour<sup>3,4</sup>, Joao A. Paulo<sup>6</sup>, Erling Tjora<sup>1,5</sup>, Pål Njølstad<sup>1,5</sup>, Jonas Ghabayen<sup>1</sup>, Ingrid Nermoen<sup>7</sup>, Valeriya Lyssenko<sup>1</sup>, Simona Chera<sup>1</sup>, Luiza M. Ghila<sup>1</sup>, Marc Vaudel<sup>1</sup>, Hanne Scholz<sup>3,4</sup>, Helge Ræder<sup>1,5</sup>

<sup>1</sup>Department of Clinical Science, University of Bergen, Bergen, Norway

<sup>2</sup>Center for Cancer Biomarkers CCBIO, Department of Clinical Medicine, University of Bergen, Bergen, Norway

<sup>3</sup>Department of Transplant Medicine and Institute for Surgical Research, Oslo University Hospital, Oslo, Norway

<sup>4</sup>Hybrid Technology Hub-Centre of Excellence, Institute of Basic Medical Sciences, University of Oslo, Oslo, Norway

<sup>5</sup>Department of Pediatrics, Haukeland University Hospital, Bergen, Norway

<sup>6</sup>Department of Cell Biology, Harvard Medical School, Boston, MA, USA.

<sup>7</sup>Department of Endocrinology, Akershus University Hospital, Lorenskog Norway

**Suppl Table 1      Clinical data**

| Parameter                         | N904-1                     | N904-2                                        | N904-6 | N904-7 |
|-----------------------------------|----------------------------|-----------------------------------------------|--------|--------|
| Mutation status                   | NM                         | NM                                            | NM     | NN     |
| Age (years)*                      | 23                         | 51                                            | 26     | 31     |
| Sex                               | F                          | M                                             | M      | M      |
| Age at diabetes diagnosis (years) | 19                         | 36                                            | NA     | NA     |
| Weight (kg)*                      | 60                         | 86                                            | 78     | 80     |
| Height (cm)*                      | 165                        | 180                                           | 186    | 176    |
| F-glucose (mM)*                   | 9,0                        | NA                                            | 4,7    | NA     |
| 2h-glucose, OGTT (mM)*            | 20,0                       | NA                                            | NA     | NA     |
| HbA1C (%)*                        | 6,4                        | 6,9                                           | 5,7    | 5,4    |
| HbA1C (mmol/mol)+                 | 34                         | 49                                            | 36     | NA     |
| Total cholesterol (mM)+           | 4.1                        | 3.4                                           | NA     | NA     |
| LDL-cholesterol (mM)+             | 2.4                        | 2.2                                           | NA     | NA     |
| HDL-cholesterol (mM)+             | 1.3                        | 1.1                                           | NA     | NA     |
| Triglycerides (mM)+               | 0.8                        | 0.53                                          | NA     | NA     |
| Treatment diabetes*               | Diet                       | Glimepirid 6 mg                               | None   | NA     |
| Treatment diabetes+               | Diet                       | Glimepirid 6 mg                               | None   | NA     |
|                                   | (Insulin during pregnancy) | Metformin 500 mg x2<br>Sitagliptin 100 mg x 1 |        |        |
| Complications diabetes            | None                       | None                                          | None   | NA     |

Data are presented as means  $\pm$  SD. P values were calculated using unpaired t-tests. \*At fibroblast sampling date. + At clinical follow-up seven years after fibroblast sampling. NA, Not available/applicable

## Legend supplementary figures

**Suppl Figure 1.** iPSC colony morphology for the three mutated clones (6A, 6D, 6F) from N904-1 and four corrected clones based on N904-1 iPSCs (E75, D13, D94 and E87). Note the classic morphology (ref Bjørlykke et al, Stem Cell International, 2019) in all these clones.

**Suppl Figure 2.** Chromatograms of three additional corrected clones: D13, D94 and E87. Note the restoration of the ATC-ATC pattern. The chromatogram of the fourth additional corrected clone, E75, is shown in Fig 1E. Specifically, we used an online tool (<http://crispr.mit.edu>) to design a guide RNA (gRNA: CCT GGG TCA AAG AAG ATT GA) targeting the Cas9 to cut exactly at the location of the mutation c.811dupA, using single-stranded donor oligonucleotide (ssODN) to serve as the HDR template (GCCCTTCCAGGAGCTGCAGATCGATGACAATGAGTATGCCTACCTCAAAGCTATCATCTTCTTTGACCCAGgtacagtgcacacctctaagccatccc). The PAM site on the ssODN template was altered with a synonymous substitution (GCC->GCT), and hence we also removed a BccI restriction enzyme site, which facilitated the subsequent screening using restriction fragment length polymorphism assays. This screening revealed that six out of 96 clones had been successfully corrected as confirmed by DNA Sanger sequencing, of which four of these corrected lines (E75,D13,D94,E87) were subsequently included in the subsequent studies. The top six most probable *in silico* detected off-target sites (one site in a coding region and six sites in non-coding regions) were unaltered as demonstrated by Sanger sequencing (Suppl Fig 3).

**Suppl Figure 3.** Sequence data of off-targets for the six *in silico* detected off target sites 1 (Chromosome 1), 2 (Chromosome X), 3 (Chromosome 8), 4 (Chromosome 2), 5 (Chromosome 15) and 6 (Chromosome 10). The sequencing was done for one mutated clone (6D), one sham-corrected clone (6D-SHAM) and four corrected clones (E75, D13, D94 and E87).

**Suppl Figure 4.** iPSC colony staining of the pluripotency markers SSAE4 and SOX2 by immunofluorescence. The staining was done for three mutated iPSC clones (6A, 6D, 6F) and four corrected clones (E75, D13, D94 and E87).

**Suppl Figure 5.** iPSC colony staining of the pluripotency markers OCT4 and NANOG by immunofluorescence and corresponding FACS quantification, performed in a second lab (C.W, H.S). The analyses were done for one mutated (*HNF4A*<sup>+/-c811dupA</sup> = Hnf4a (+/-)) iPSC clone (6D) and two corrected (*HNF4A*<sup>+/-corrected</sup> = Hnf4a (+/+)) clones (D13 and D94).

**Suppl Figure 6.** Embryoid bodies (day 4) demonstrating pluripotency potential by immunofluorescence markers for each of the three germ layers: ectoderm (OTX2), endoderm (SOX17) and mesoderm (Brachyuri). The assay was done for three mutated clones (6A, 6D, 6F), one sham-corrected clone (6D-SHAM) and four corrected clones (E75, D13, D94 and E87)

**Suppl Figure 7.** Chromosome analysis of the fixed cell suspensions at passage 20 from three mutated iPSC clones (6A, 6D, 6F) and four corrected clones (E75, D13, D94 and E87). 6A and 6D showed Trisomy 1 in all 20 lines investigated, whereas 6F showed Trisomy 1 in 1/20 lines and isochromosome 1q (break p10) in the remaining 19/20 lines. Trisomy 1 (47,XY,+1) and isochromosome 1q have been reported as a recurrent chromosomal abnormality in stem cell lines. E75 showed 46,XY,del (18)(q11.2) in 15/20 lines and 45,X0 with normal

chromosome 18 in the remaining 5/20 lines. D13 showed 46,XY,del (18)(q11.2) in 14/20 lines and 45,X0 with normal chromosome 18 in the remaining 6/20 lines. D94 showed 46,XY,del (18)(q11.2) in 17/20 lines and 45,X0 with normal chromosome 18 in the remaining 3/20 lines. E87 showed 46,XY,del (18)(q11.2) in 16/20 lines and 45,X0 with normal chromosome 18 in the remaining 4/20 lines. The extent to which these genomic alterations potentially perturb the experimental readouts is unclear as most of the chromosomes remained intact. However, the information of chromosomal aberrations must be kept in mind when interpreting the results.

**Suppl Figure 8.** Details of quality control of differentiation for mutated (*HNF4A*<sup>+/-c811dupA</sup> = Hnf4a (+/-)), corrected (*HNF4A*<sup>+/-corrected</sup> = Hnf4a (+/+)) and control (hESC) lines.

- (A) Flow cytometric analysis of Stage 1 cells immunostained for SOX17. hES-1 cell line used as positive control, undifferentiated iPS cells were used as negative control in blue color.
- (B) Flow cytometric analysis of Stage 4 cells immunostained for PDX1 and NKX6.1.
- (C) Flow cytometric analysis of Stage 5 cells immunostained for PDX1 and NKX6.1.
- (D) Immunostaining of Stage 5 cells stained for the indicated markers. hES-1 cell line differentiated cells at Stage 4 were used as process control. Scale bar = 50  $\mu$ m.
- (E) Flow cytometric analysis of Stage 7 cells immunostained for INSULIN. hES-1 cell line used as positive control, undifferentiated iPS cells were used as negative control in blue color.

**Suppl Figure 9 A)** The relative protein abundance of pancreatic hormones and selected  $\beta$ -cell markers for mutated (*(HNF4A*<sup>+/-c811dupA</sup>); 6D) and corrected (*(HNF4A*<sup>+/-corrected</sup>); E75) cells differentiated in the 3D cell aggregate format (first row), the 3D alginate bead environment (second row). **B)** Analysis of pathways and upstream regulators (using Ingenuity Pathway Analysis (IPA) generated top canonical pathways (z-score > 2) in the class a DAPs analysis of alginate-encapsulated cells. C) IPA-generated top disease annotations and the most differentially abundant protein in class a DAPs analysis of alginate-encapsulated cells, the PSMB9 (a proteasome protein). Significant differences are shown as \*p < 0.05, \*\*p < 0.01, \*\*\*p < 0.001, \*\*\*\*p < 0.0001 by Student's t-test. D) The abundance level of ALDOA, TPI1, PGK1 and ENO1 in 2D.

**Suppl Figure 10.** Rescue of HNF4A protein shown by FACS of HNF4A, evidenced by higher HNF4A counts (left panel) in the corrected clone (*(HNF4A*<sup>+/-corrected</sup> = Hnf4a (+/+); D13) compared to the mutated clone (*(HNF4A*<sup>+/-c811dupA</sup> = Hnf4a (+/-); D6). Right panel shows HNF4A immunoblotting of different mutated and corrected clones and corresponding quantification normalized by GAPDH expression, with hepatocyte expression as a positive control.

**Suppl Figure 11.** RNA-seq data. **A).** Aggrewell RNA-seq data. Violin plots showing normalized RNA-seq-based expression levels and the corresponding comparative original proteome-based protein levels for the four differentially expressed proteins shown in Figure 4D. The mutated cell lines (red) include 6a (6A), 6d (6D) and 6f (6F) and the corrected cell lines (green) include d13 (D13), d94 (D94), e75 (E75) and e87 (E87). Note the partial correspondence, in particular the direction, between protein and mRNA levels. Complete correspondence cannot be anticipated since the dynamic quantitative levels of proteins and nRNAs, respectively, are results of different processes with discrepancies related to different half-lives between transcripts and proteins, miRNA intervention, delays between transcription and translation as well as other forms posttranscriptional regulation. **B).** Alginate RNA-seq data. Overview of mRNA expression levels and the corresponding comparative original proteome-



based protein levels for the differentially expressed glycolytic proteins shown in Figure 3C and detailed comparative violinplots for each of these proteins (Hexokinase = *HK1* and *HK2*; Phosphofructokinase = *PFKM*, *PFKL*, *PFKP*; Aldolase = *ALDOA*, Triphosphate isomerase = *TPII*; Glyceraldehyde 3 phosphate = *GAPDH*; Phosphoglycerate kinase = *PGK1*; Phosphomutase = *PGAM1*; Enolase = *ENOA* and *ENOB*; pyruvate kinase = *PKM*). We also provide comparative analysis of proteins and corresponding mRNA levels for stearate biosynthesis genes (*HSD17B10*, *SLC27A3*, *ACOT1*, *FASN*, *ACSL1*, *DHCR24*, *MBOAT7*, *ZADH2*). The mutated cell lines (red) include 6a (6A), 6d (6D) and 6f (6F) and the corrected cell lines (green) include d13 (D13), d94 (D94), e75 (E75) and e87 (E87). Note the very low to even zero levels of mRNA in alginate-encapsulated cells (but not in 2D cells), disallowing a valid comparison with protein levels and probably reflecting the challenges with robust mRNA retrieval from alginate-encapsulated cells.

**Suppl Figure 12.** Light microscopy images of ST7 cells in Aggrewell for three mutated clones (6A, 6D, 6F) and four corrected clones (E75, D13, D94 and E87). Note the “aggregated” morphology in the mutated clones, which is restored to normal “non-aggregated” morphology in the corrected clones.

**Suppl Figure 13.** Functional studies of ST7 cells in the 2D and aggregated 3D context. A) Insulin secretion levels at low glucose (2 nM), high glucose (20 nM) and KCl stimulation during static incubation of mutated clones ( (*HNF4A*<sup>+/-c811dupA</sup> = Hnf4a (+/-)); 6A) vs corrected clones (*HNF4A*<sup>+/-corrected</sup> = Hnf4a (+/+)); D94) at 2D or 3D (Aggrewell conditions). B) The corresponding insulin secretion indices for high vs low glucose levels. C) The corresponding insulin release fold change for KCl vs high glucose levels. Note that 3D conditions restore KCl-stimulated insulin secretion in corrected clones (in contrast to Glucose-stimulated insulin secretion). D) Dynamic glucose-stimulated insulin secretion of mutated clones ( *HNF4A* +/-; 6A) vs corrected clones (*HNF4A* +/+; D94) at 2D or 3D (Aggrewell conditions). E) Oxygen consumption rates (OCR) at baseline, high glucose condition (20 mM) , Oligomycin stimulation, CCCP stimulation and Rotenone stimulation of mutated clones ( *HNF4A* +/-; 6A) vs corrected clones (*HNF4A* +/+; D94) at 2D or 3D (Aggrewell conditions). F, The corresponding AUCs of the OCR curve at baseline, high glucose and CCCP stimulation. Note the significant higher levels at baseline and high glucose conditions in corrected clones at 3D conditions (Aggrewell).

## Supplementary Figure 1

### MUTATED CLONES

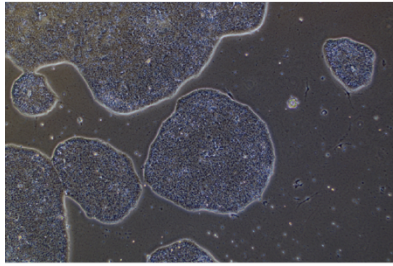

6A

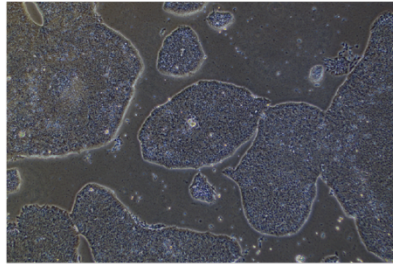

6D

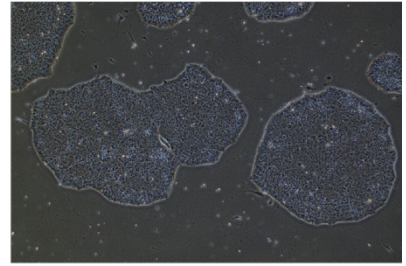

6F

### CORRECTED CLONES

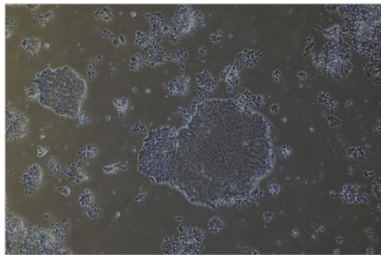

E75

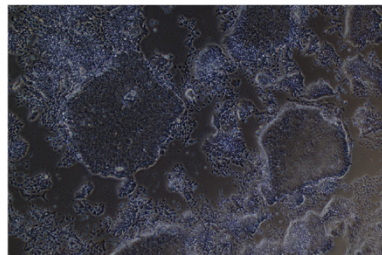

D13

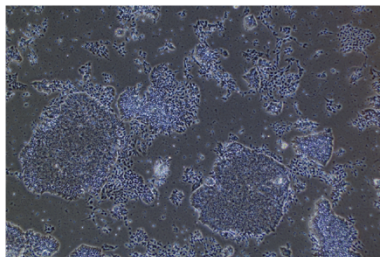

D94

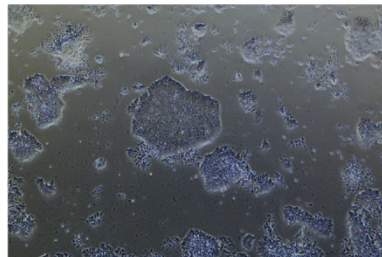

E87

## Supplementary Figure 2

### CORRECTED CLONES

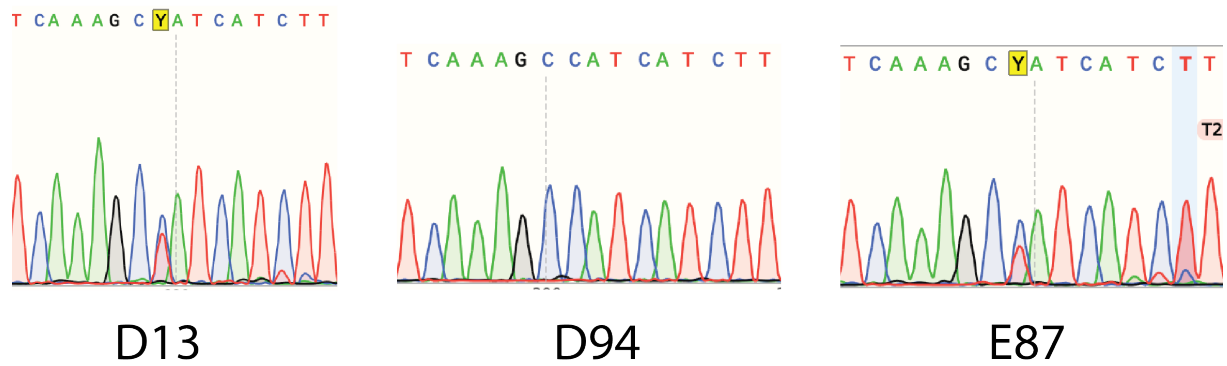

Supplementary Figure 3: Please see the end of this file

Supple-  
mentary  
Figure 4  
6A

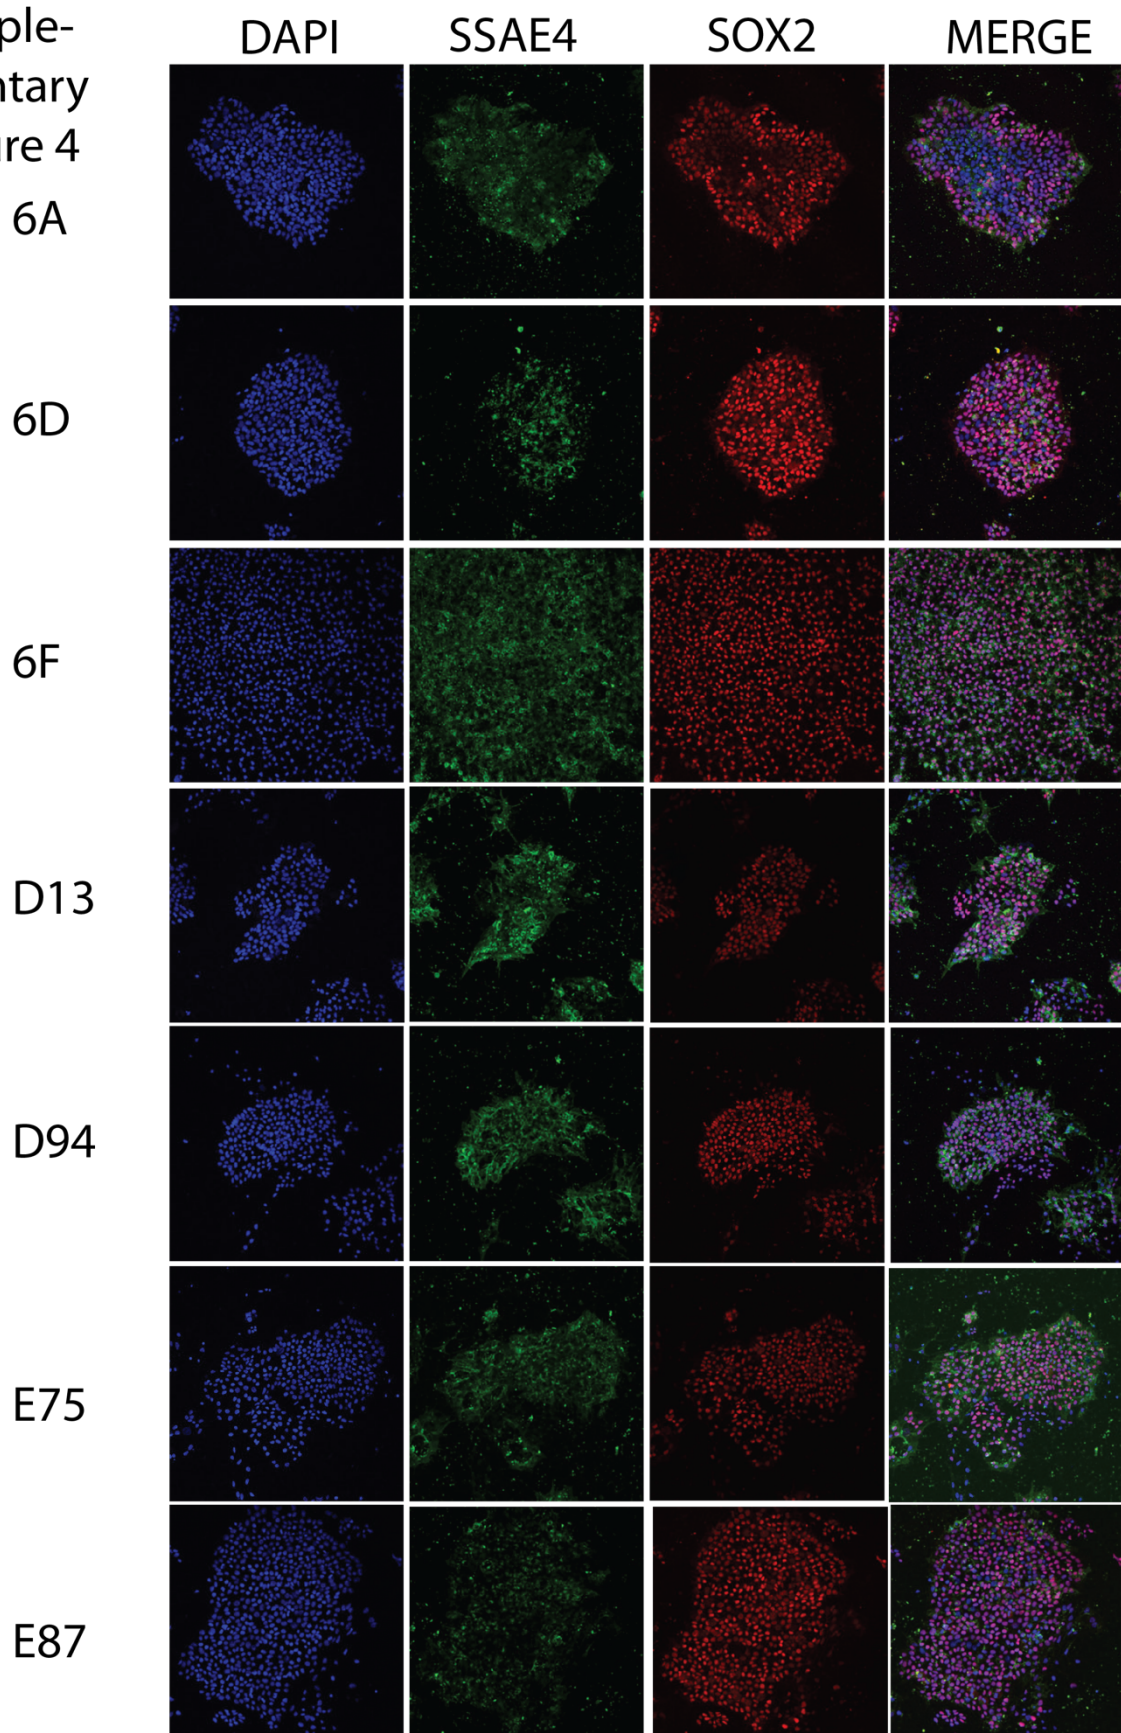



Supplementary Figure 5

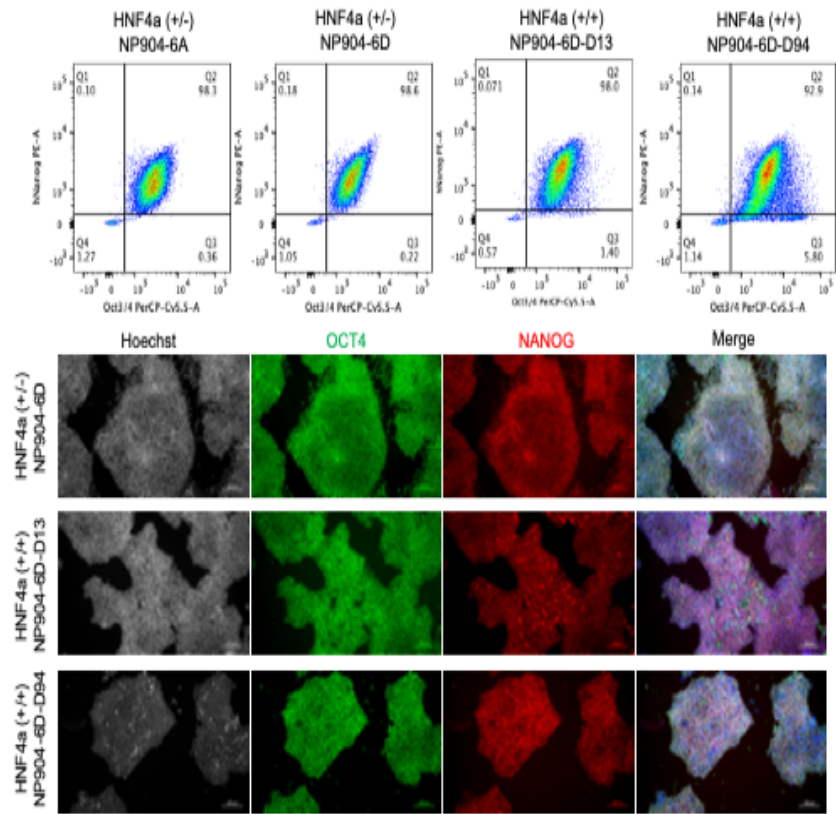

## Supplementary Figure 6

### MUTATED CLONES

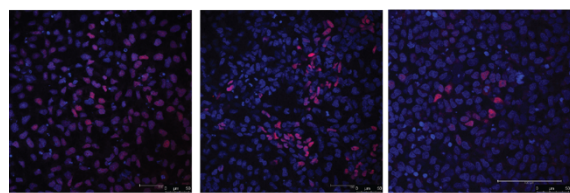

OTX2 SOX17 BRACHYURI  
6A

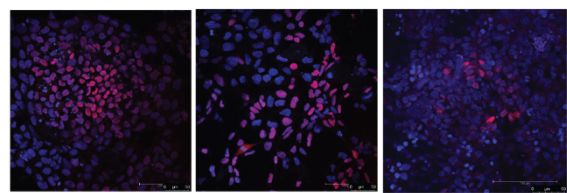

OTX2 SOX17 BRACHYURI  
6D

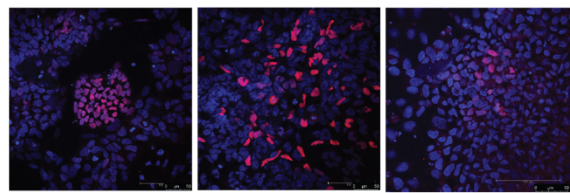

OTX2 SOX17 BRACHYURI  
6F

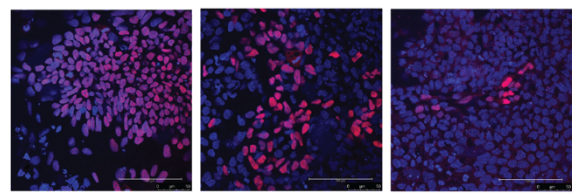

OTX2 SOX17 BRACHYURI  
6D-SHAM

### CORRECTED CLONES

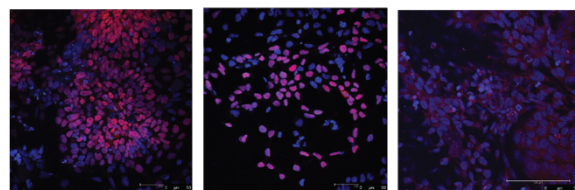

OTX2 SOX17 BRACHYURI  
E75

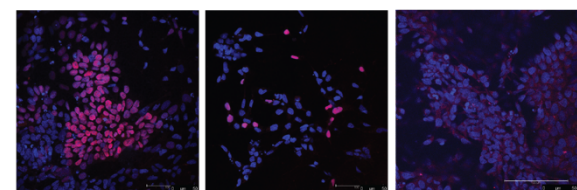

OTX2 SOX17 BRACHYURI  
D13

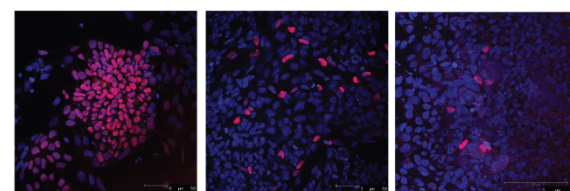

OTX2 SOX17 BRACHYURI  
D94

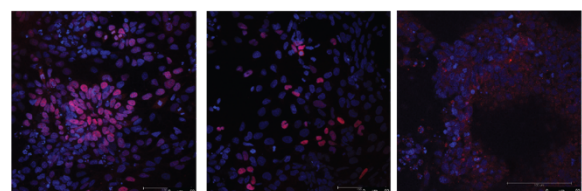

OTX2 SOX17 BRACHYURI  
E87

# Supple- mentary Figure 7

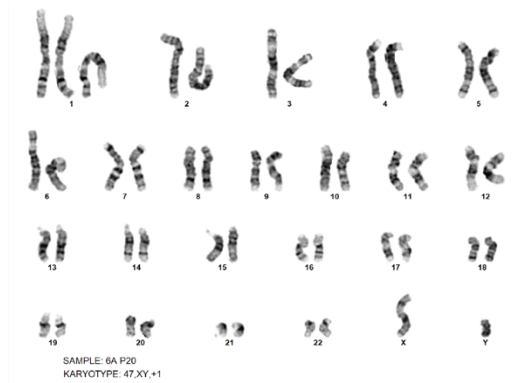

6A: 47,XY,+1

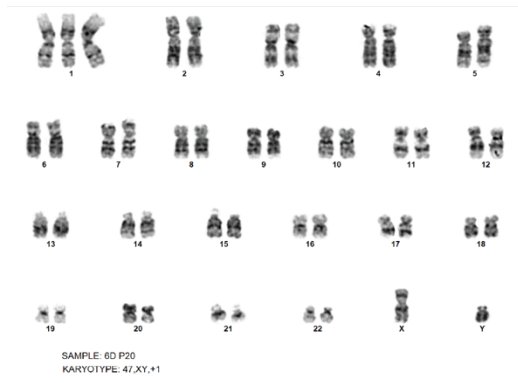

6D: 47, XY,+1

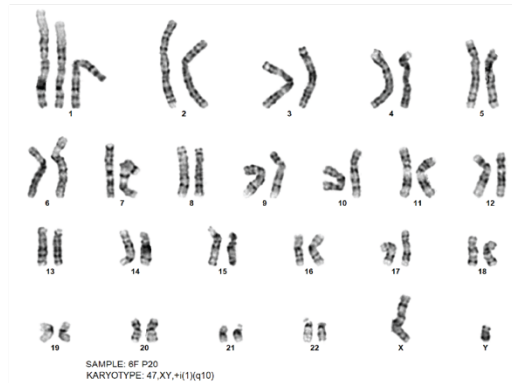

6F:47,XY,+i(1)(q10)

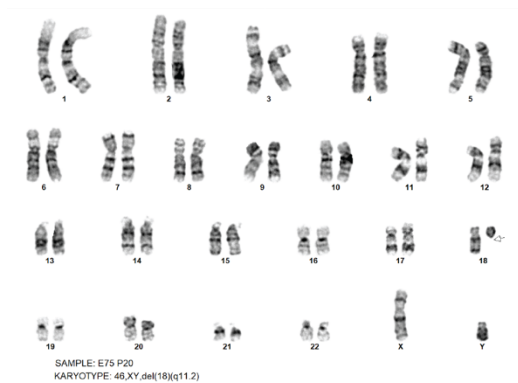

E75: 46,XY,del(18)(q11.2)

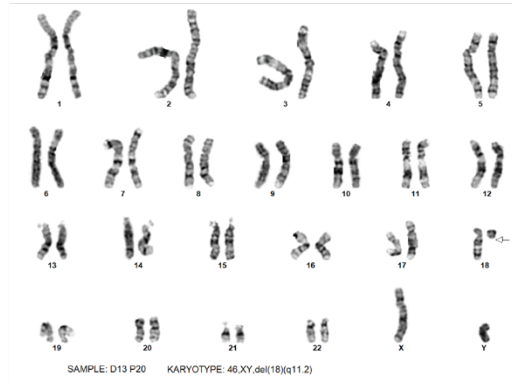

D13: 46,XY,del(18)(q11.2)

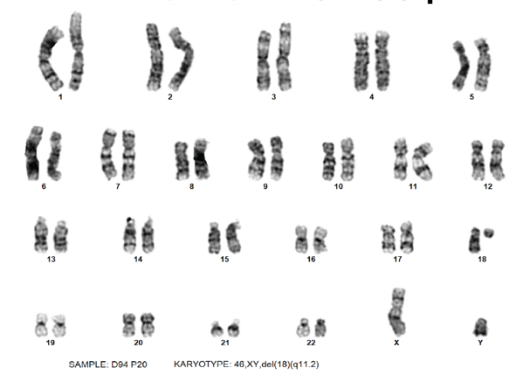

D94: 46,XY,del(18)(q11.2)

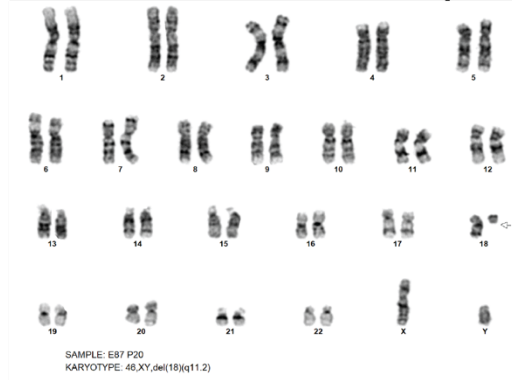

E87: 46,XY,del(18)(q11.2)

Supplementary Figure 8

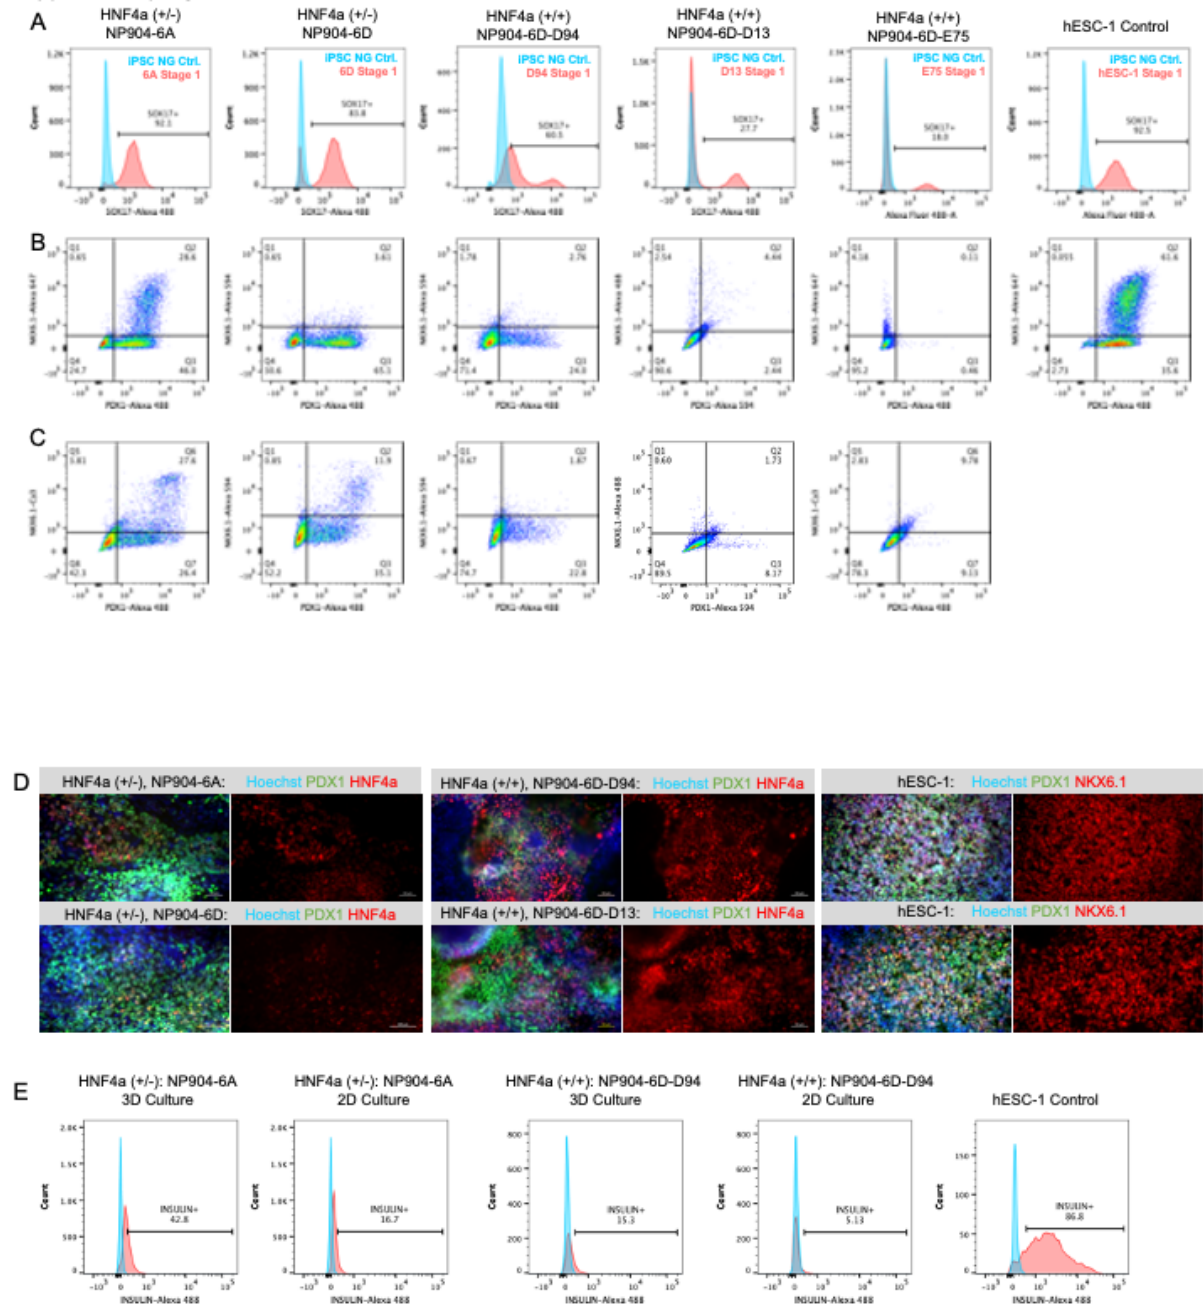



Supplementary Figure 9

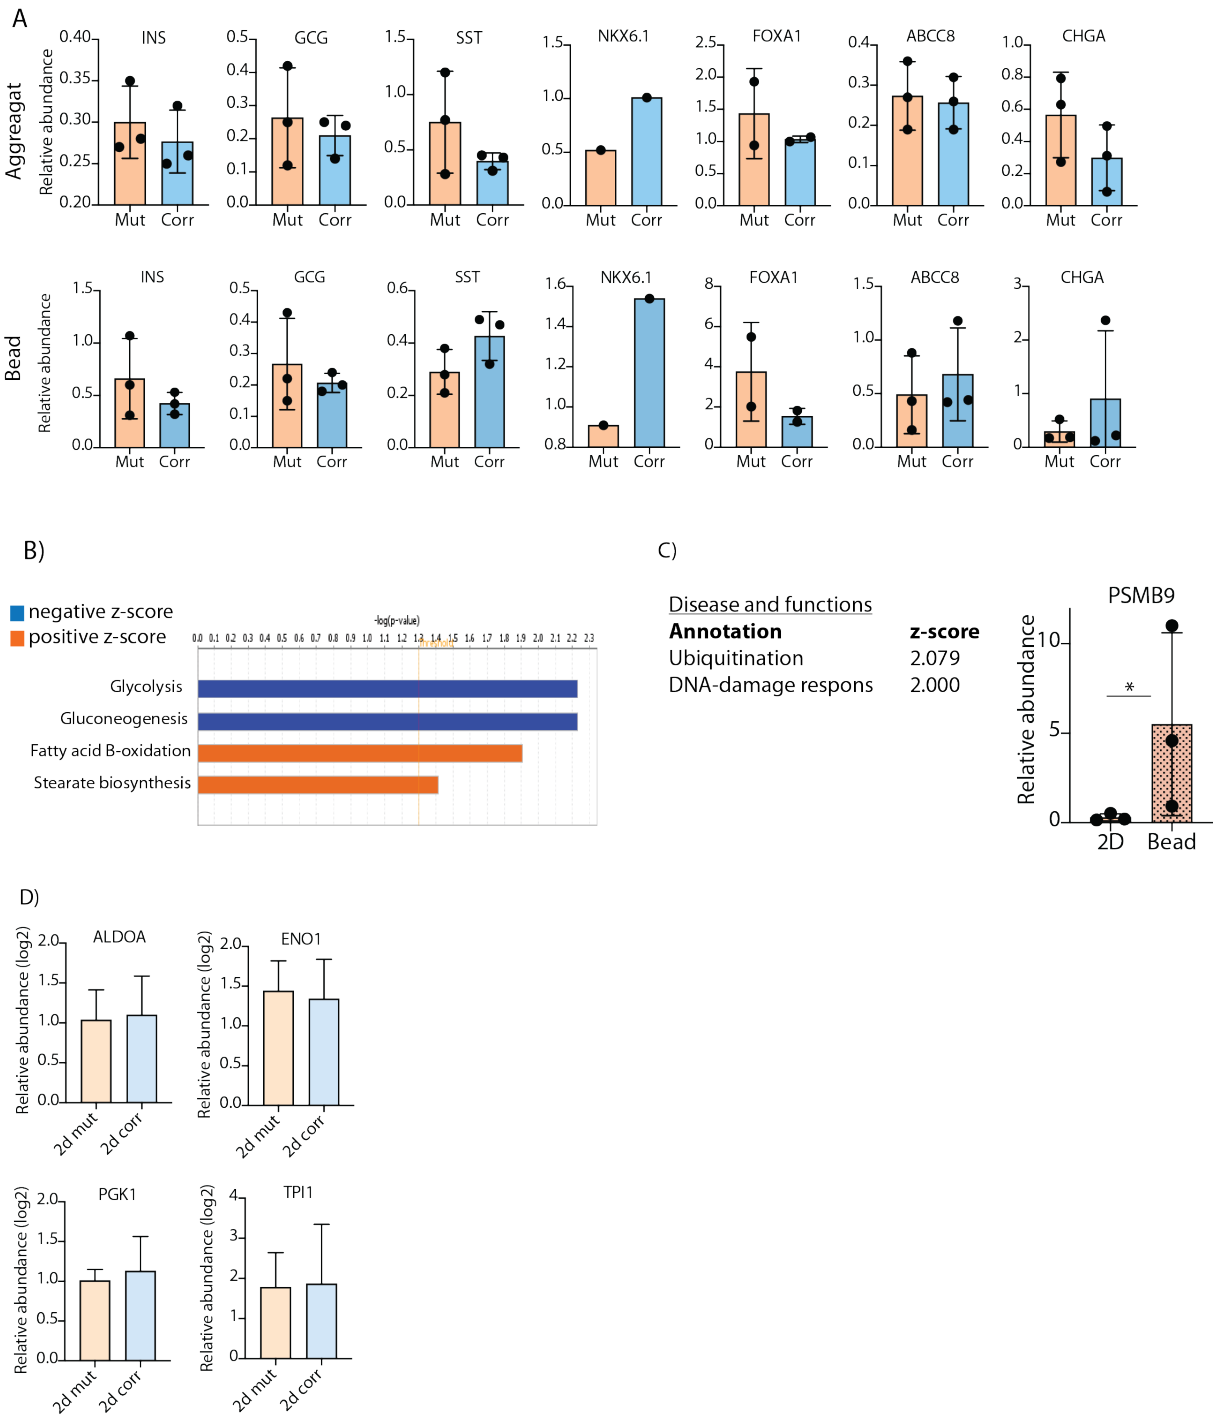

Supplementary Figure 10

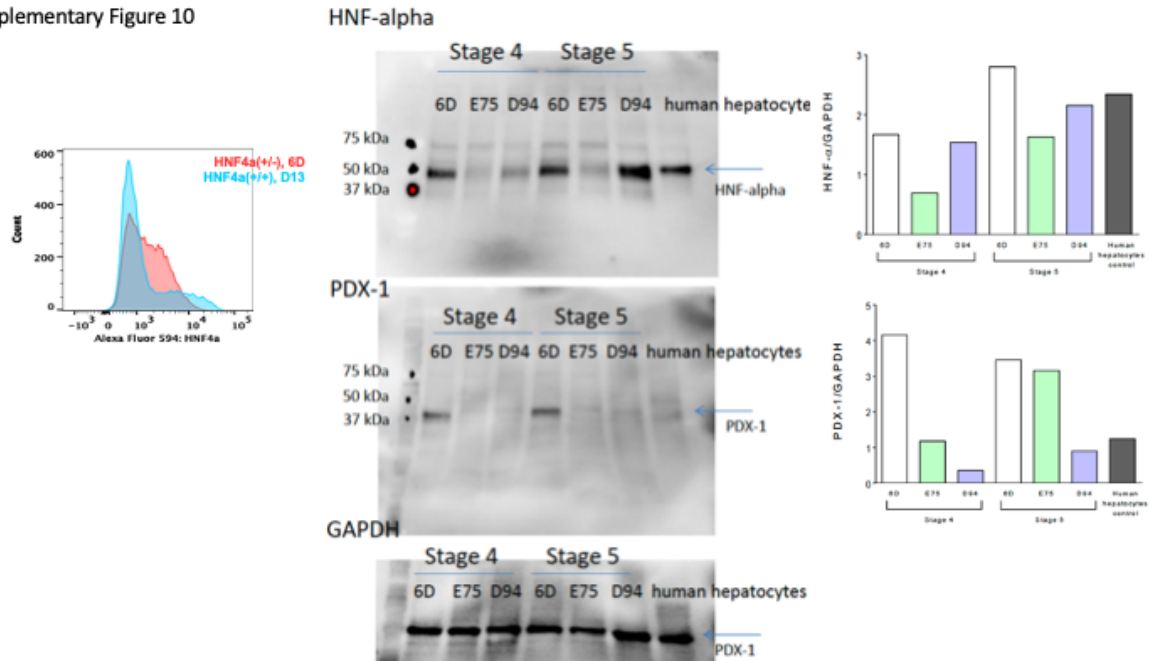

# Supple- mentary Figure 11A

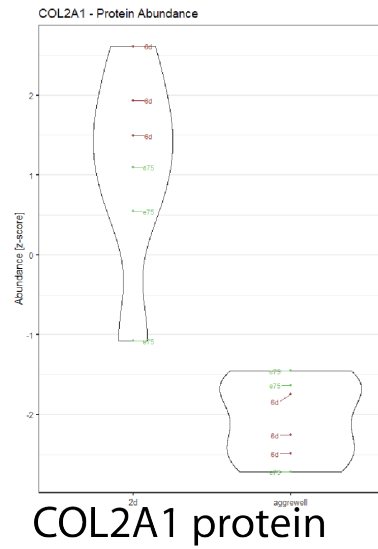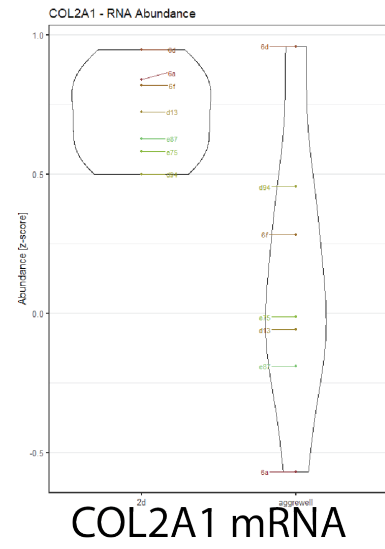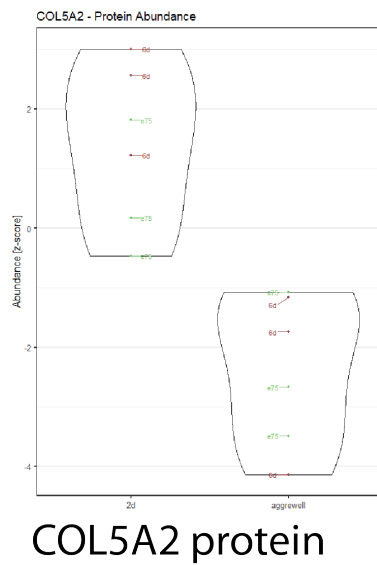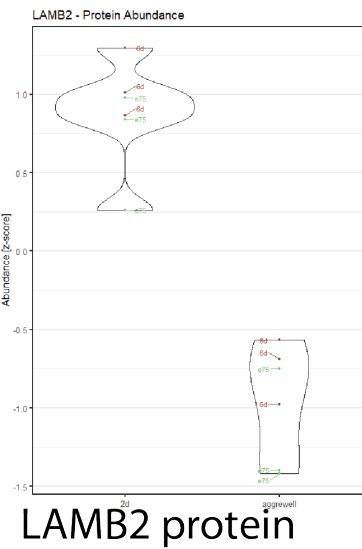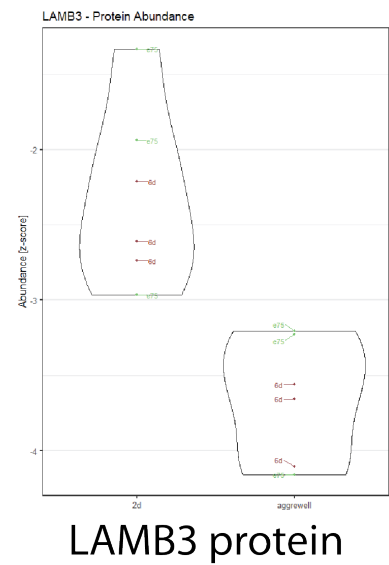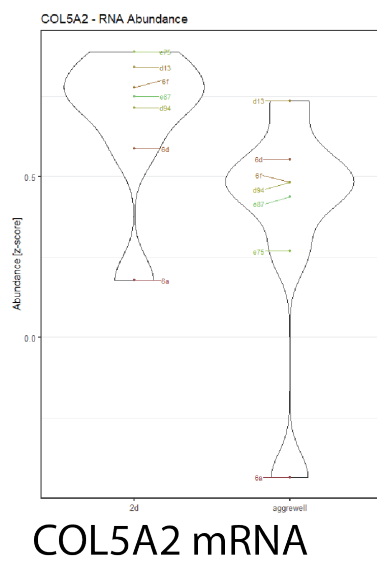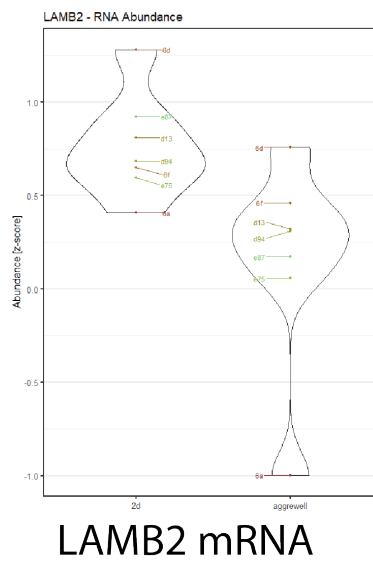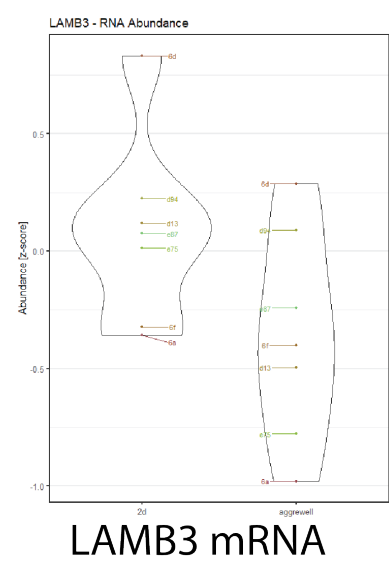

# Supplementary Figure 11B

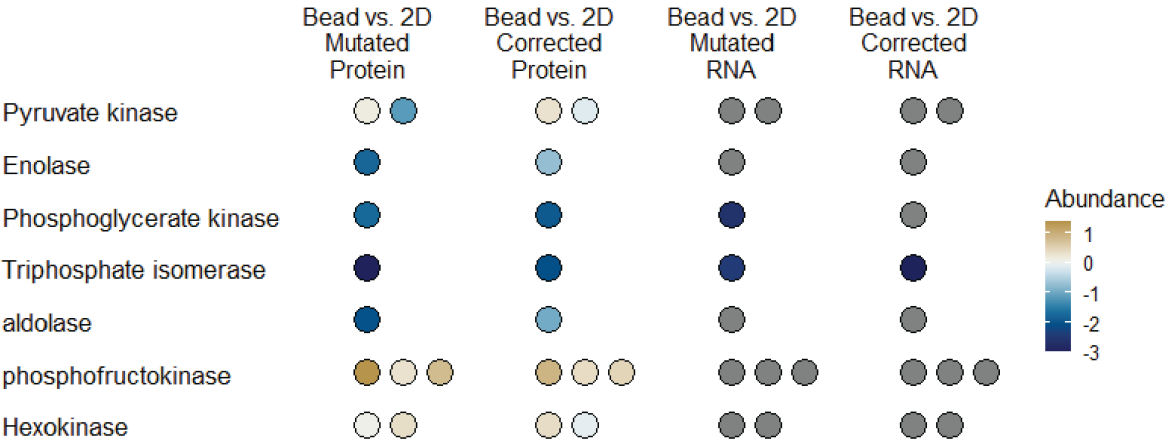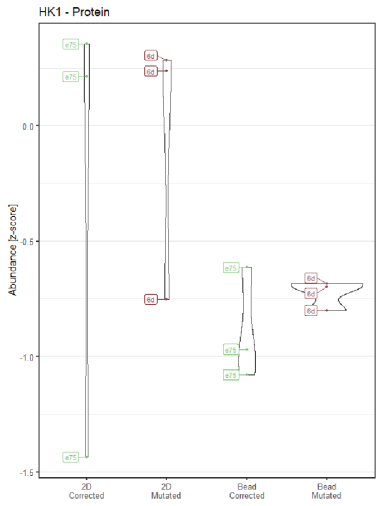

HK1 protein

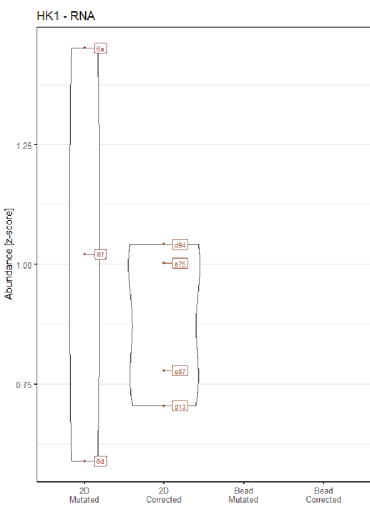

HK1 mRNA

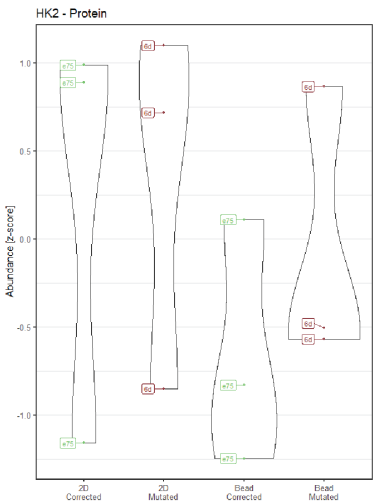

HK2 protein

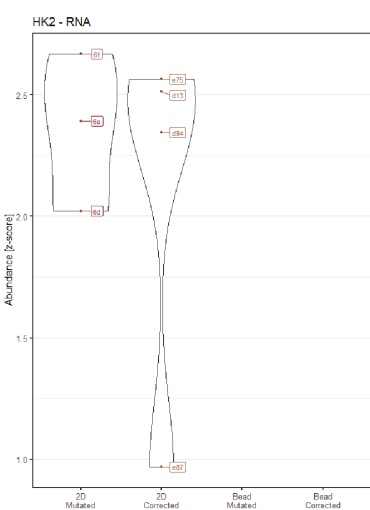

HK2 mRNA

Supplementary  
Figure 11B con-  
tinued

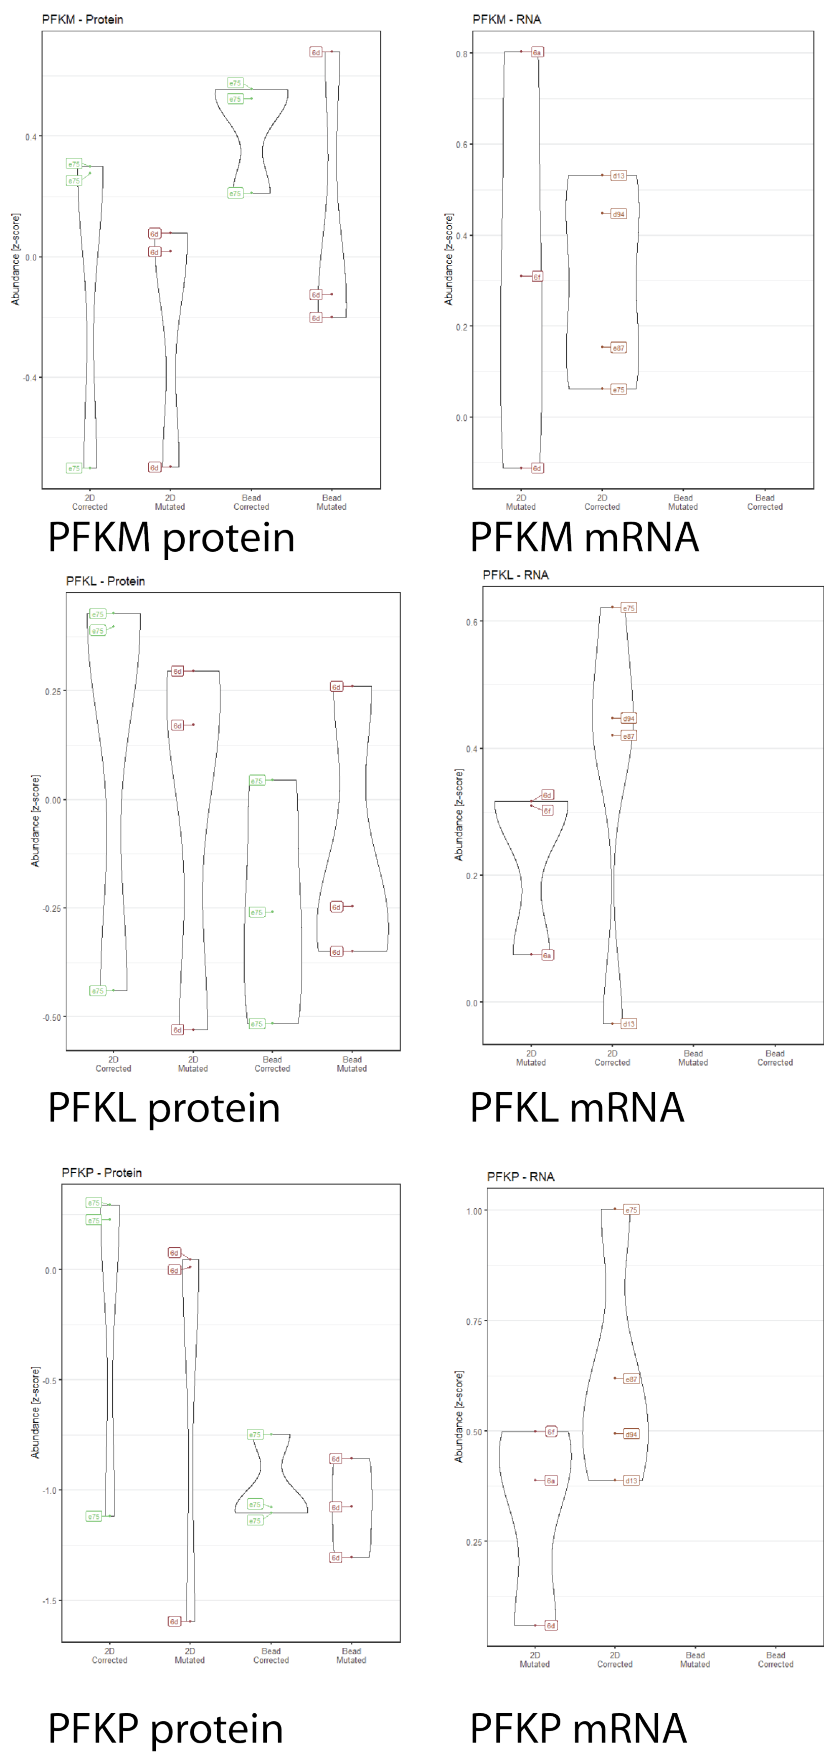

# Supplementary Figure 11B con- tinued

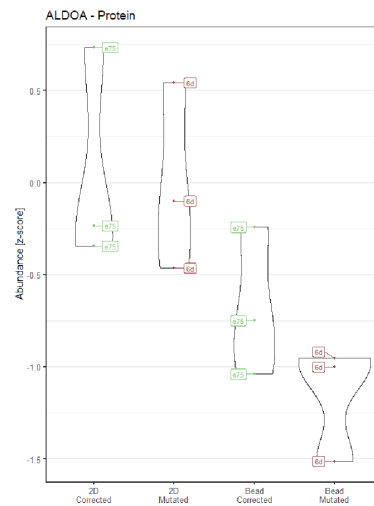

ALDOA protein

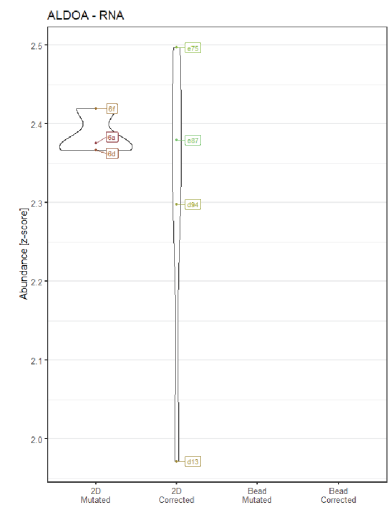

ALDOA mRNA

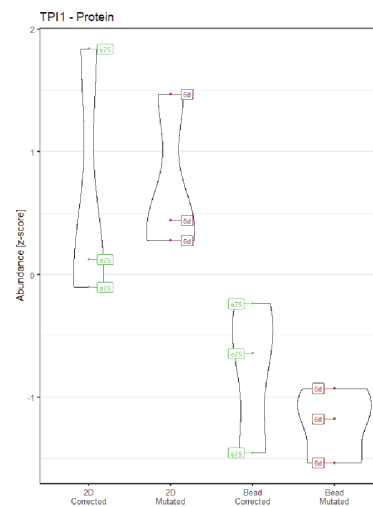

TPI1 protein

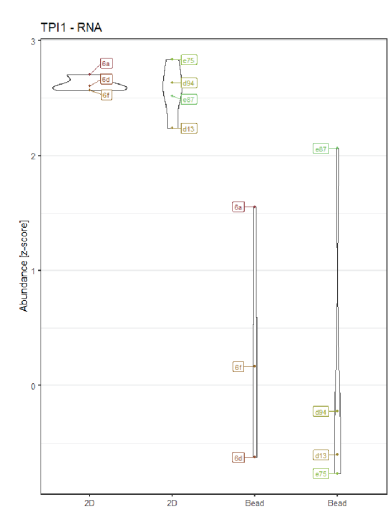

TPI1 mRNA

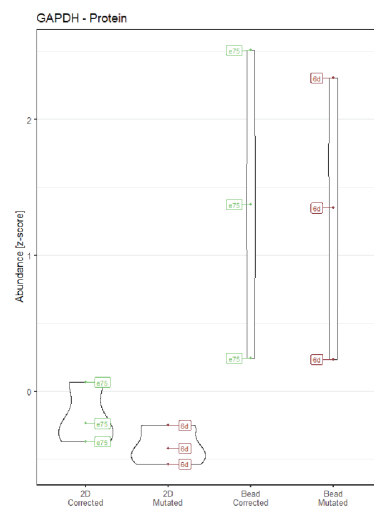

GAPDH protein

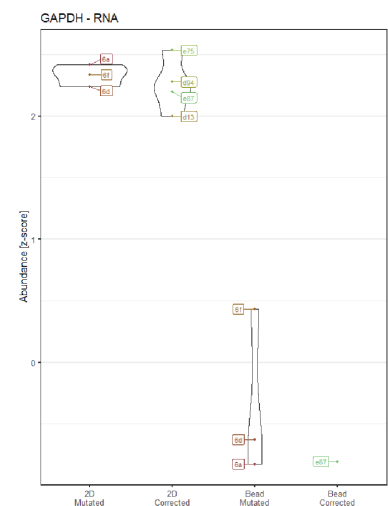

GAPDH mRNA

# Supplementary Figure 11B con- tinued

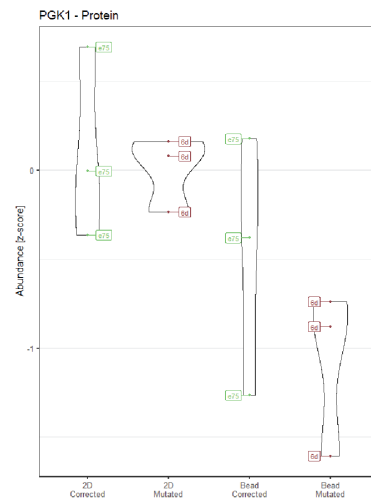

PGK1 protein

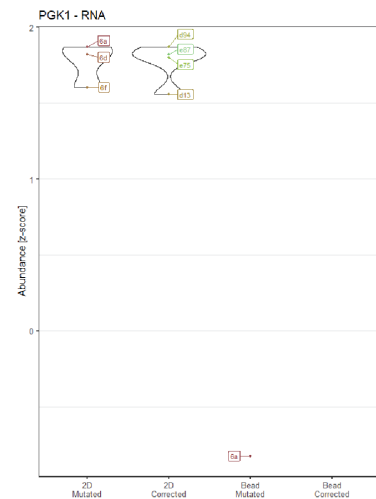

PGK1 mRNA

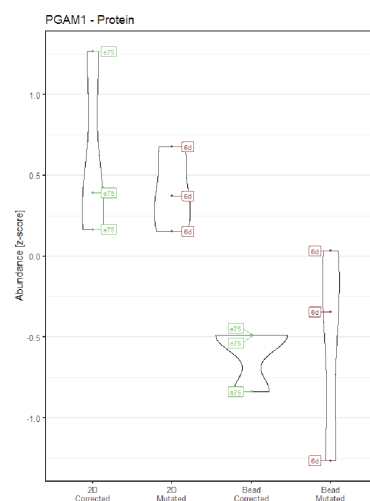

PGAM1 protein

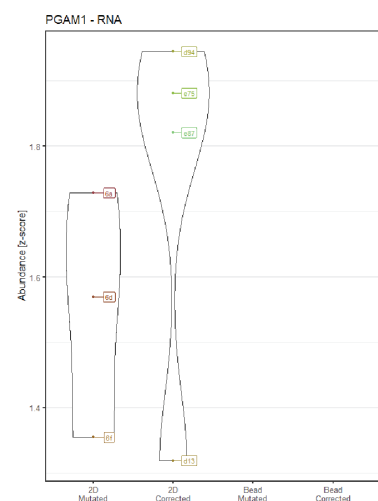

PGAM1 mRNA

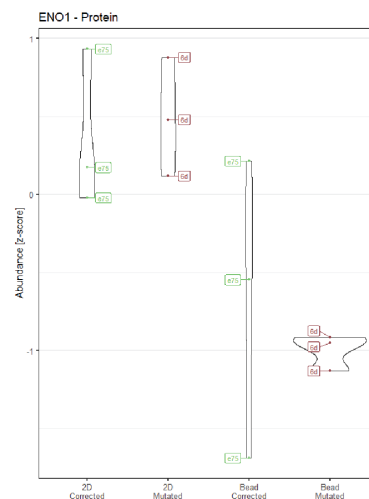

ENO1 protein

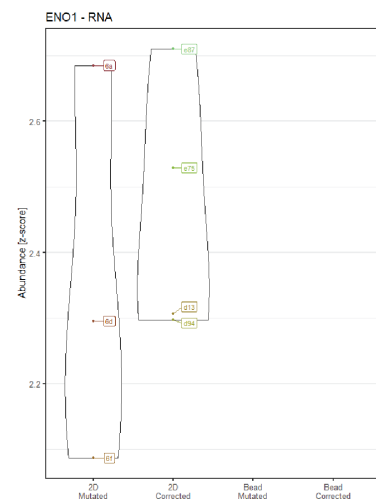

ENO1 mRNA

Supplementary  
Figure 11B con-  
tinued

Stearate biosyn-  
thesis  
proteins/mRNAs:

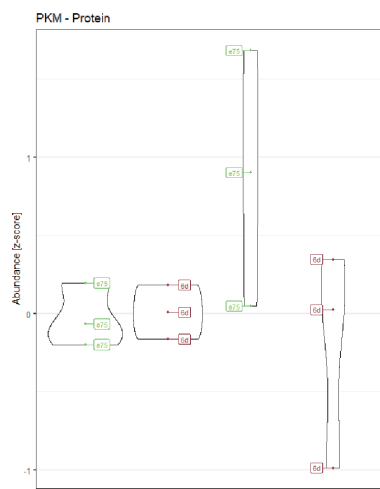

PKM protein

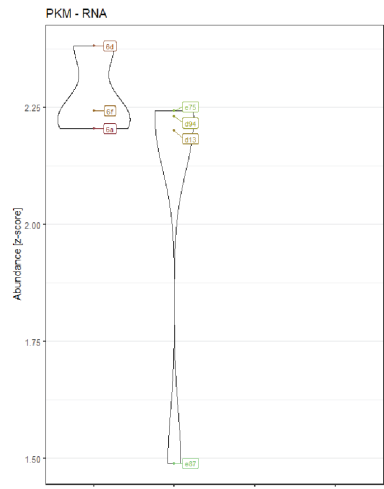

PKM mRNA

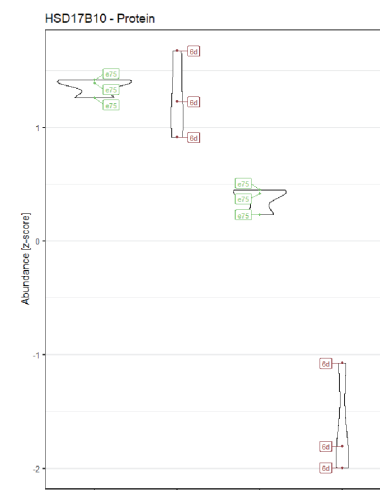

HSD17B10 protein

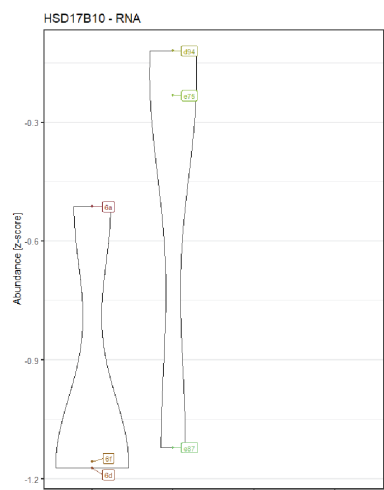

HSD17B10 mRNA

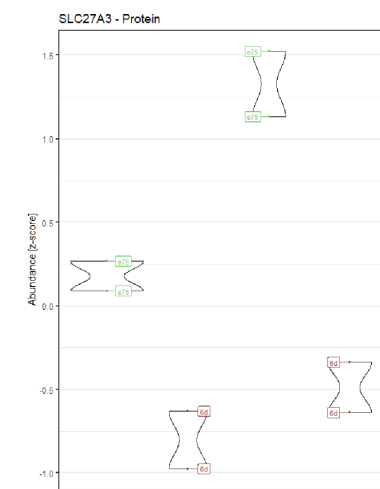

SLC27A3 protein

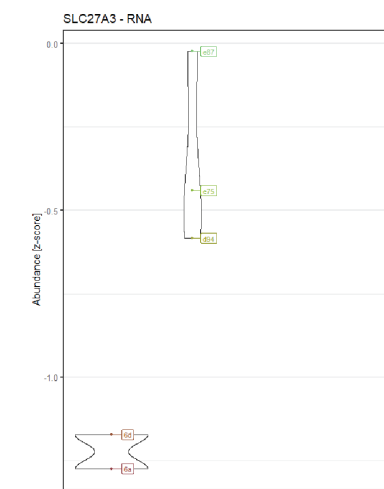

SLC27A3 mRNA



Supplementary  
Figure 11B con-  
tinued

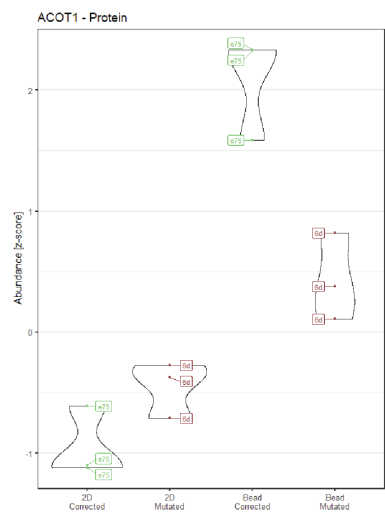

ACOT1 protein

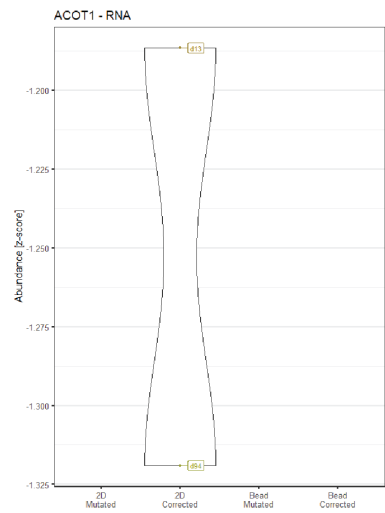

ACOT1 mRNA

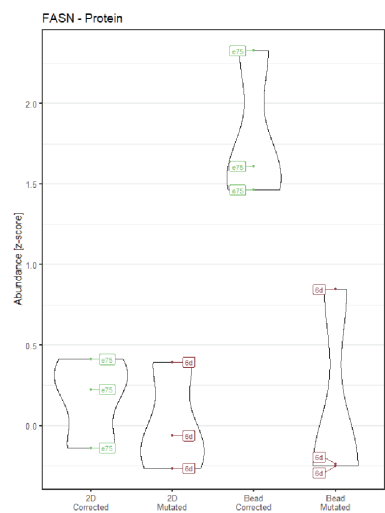

FASN protein

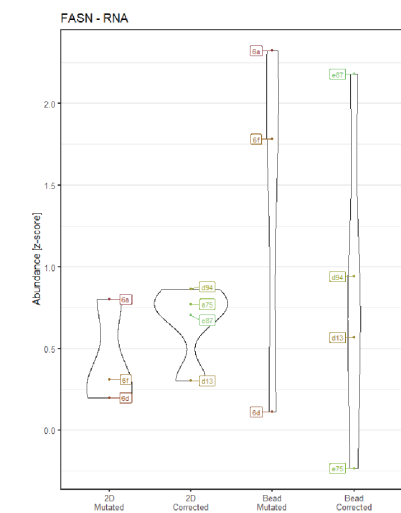

FASN mRNA

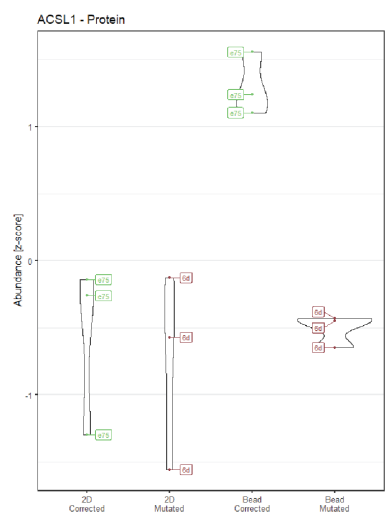

ACSL1 protein

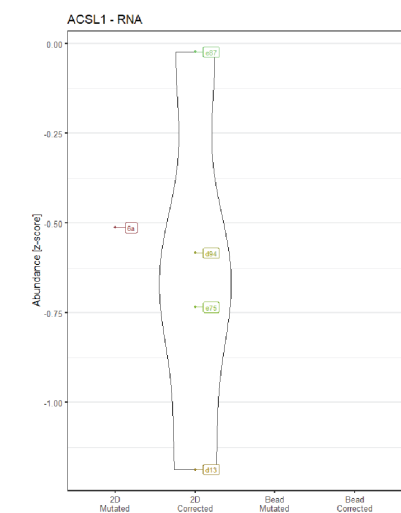

ACSL1 mRNA

Supplementary  
Figure 11B con-  
tinued

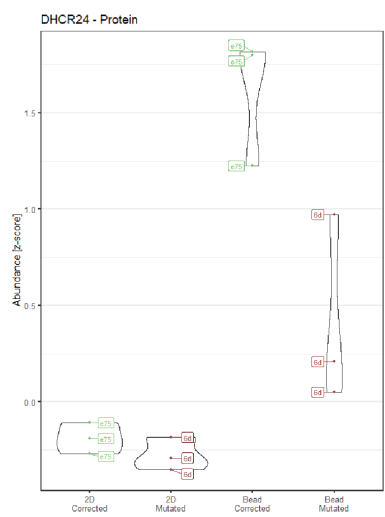

DHCR24 protein

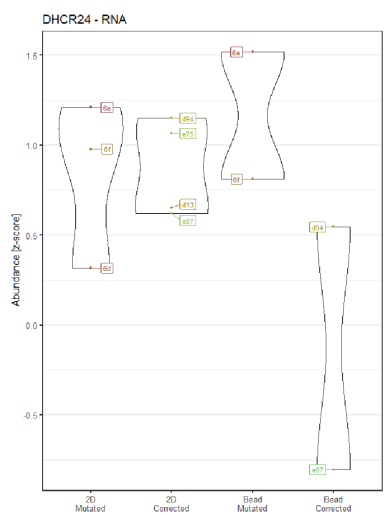

DHCR24 mRNA

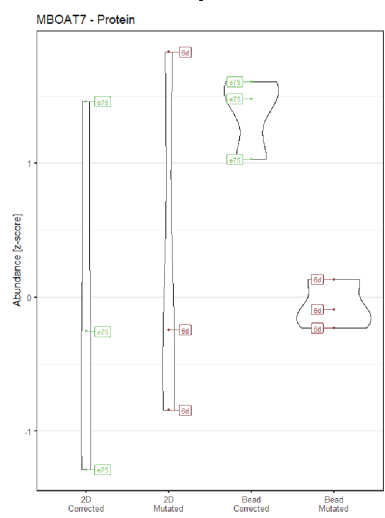

MBOAT7 protein

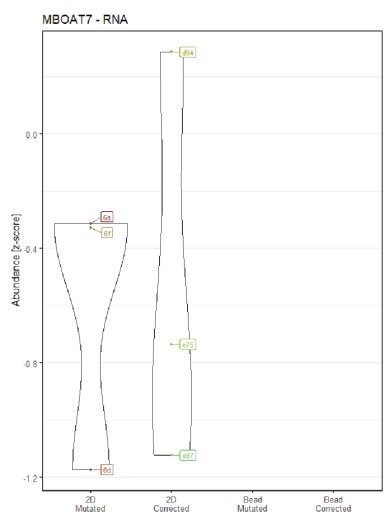

MBOAT7 mRNA

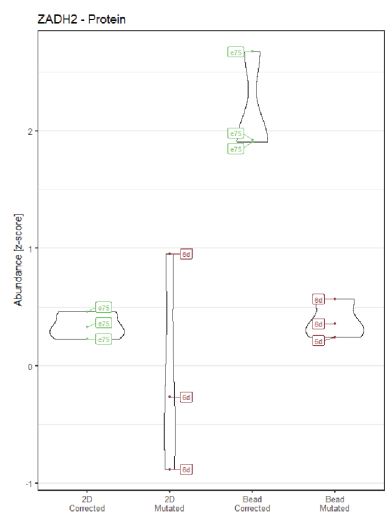

ZADH2 protein

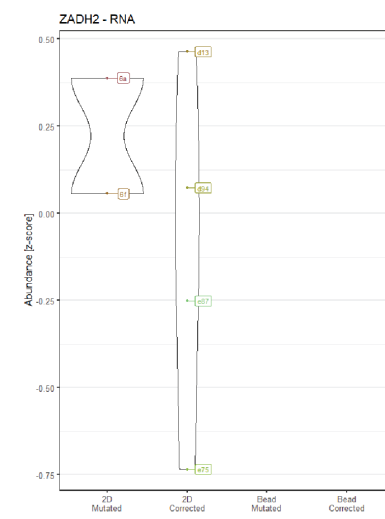

ZADH2 mRNA

## Supplementary Figure 12

### MUTATED CLONES

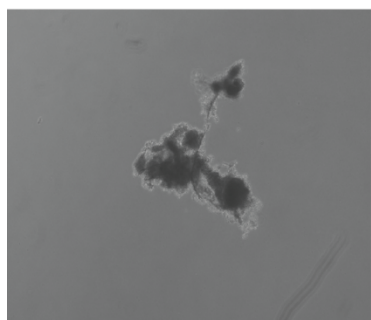

6A

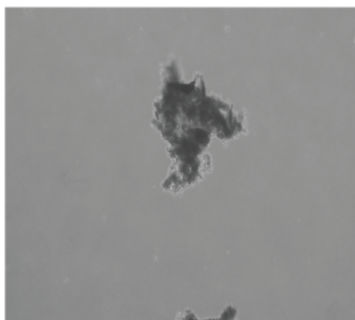

6D

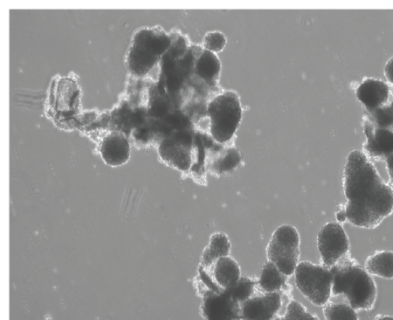

6F

### CORRECTED CLONES

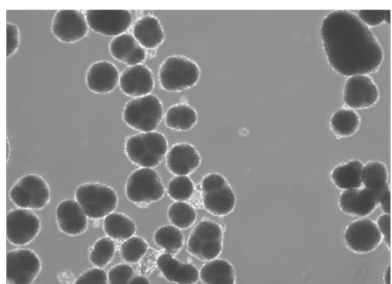

E75

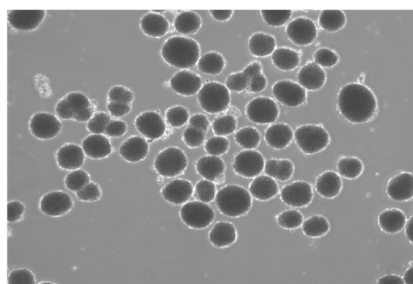

D13

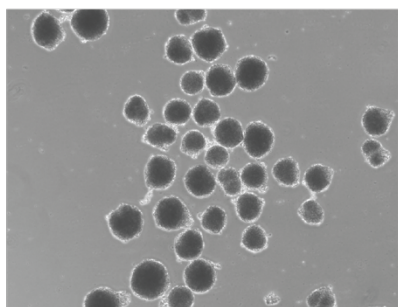

D94

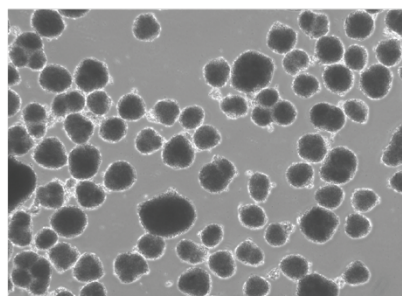

E87

### Supplementary Figure 3

**A**

Insulin ( $\mu$ U/60 clusters)

Low High KCl

HNF4a (+/-)

Low High KCl

HNF4a (+/-) 3D

HNF4a (+/-) 2D

**B**

Insulin secretion index (20mM/2mM)

Low High KCl

HNF4a (+/-)

Low High KCl

HNF4a (+/-) 3D

HNF4a (+/-) 2D

**C**

Insulin releases fold change (KCl/20mM)

3D 2D

HNF4a (+/-)

3D 2D

HNF4a (+/-)

**D**

Dynamic GSIS

Insulin ( $\mu$ U/ml) per 60 clusters

Time (minutes)

1.67mM Glu 20mM Glu 1.67mM Glu

HNF4a (+/-) 3D

HNF4a (+/-) 2D

HNF4a (+/-) 3D

HNF4a (+/-) 2D

**E**

Oxygen consumption rate

OCR (% Baseline)

Time (minutes)

20mM Glucose

Oligo

CCCP

Rot.

HNF4a (+/-) 3D

HNF4a (+/-) 2D

HNF4a (+/-) 3D

HNF4a (+/-) 2D

**F**

AUC-Baseline

AUC-20mM Glu Stimuli

AUC-CCCP

Area Under Curve of OCR

3D 2D

HNF4a (+/-)

3D 2D

HNF4a (+/-)

3D 2D

HNF4a (+/-)

3D 2D

HNF4a (+/-)

**Off-target site nr. 1:** GCTAGCTCAAAGAAGATTGAGAG score 1.5 3mm (1:4:6) **locus** chr1:+62261902  
ENST00000371158.2

```
>Off1
AAGCACATTTTCATGACTCTTGGCTTTAAAAGCCTTATGGGGAAAGTTGAAATACTTACA
GCTAGCTCAAAGAAGATTGAGAGAGGAAGCCTATTGGTTCTGATAGACTTCAGGAATTGG
GCTTGACATAGATTAAGAATACTGTTCTTGCTCACACTTTTTCAGAAAGCTAGAAGACCT
ATTGGAGGGAGATCAGTGTGT
>6Do
AAGCACATTTTCATGACTCTTGGCTTTAAAAGCCTTATGGGGAAAGTTGAAATAYTTACAG
CTAGCTCAAAGAAGATTGAGAGAGGAAGCCTATTGGTTCTGATAGACTTCAGGAATTGGG
CTTGACATAGATTAAGAATACTGTTCTTGCTCACACTTTTTCAGAAAGCTAGAAGACCTA
TTGGAGGGAGATCAGTGTGT
>6Dshao
AAGCACATTTTCATGACTCTTGGCTTTAAAAGCCTTATGGGGAAAGTTGAAATAYTTACAG
CTAGCTCAAAGAAGATTGAGAGAGGAAGCCTATTGGTTCTGATAGACTTCAGGAATTGGG
CTTGACATAGATTAAGAATACTGTTCTTGCTCACACTTTTTCAGAAAGCTAGAAGACCTA
TTGGAGGGAGATCAGTGTGT
>D13o
AAGCACATTTTCATGACTCTTGGCTTTAAAAGCCTTATGGGGAAAGTTGAAATAYTTACAG
CTAGCTCAAAGAAGATTGAGAGAGGAAGCCTATTGGTTCTGATAGACTTCAGGAATTGGG
CTTGACATAGATTAAGAATACTGTTCTTGCTCACACTTTTTCAGAAAGCTAGAAGACCTA
TTGGAGGGAGATCAGTGTGT
>D94o
AAGCACATTTTCATGACTCTTGGCTTTAAAAGCCTTATGGGGAAAGTTGAAATAYTTACAG
CTAGCTCAAAGAAGATTGAGAGAGGAAGCCTATTGGTTCTGATAGACTTCAGGAATTGGG
CTTGACATAGATTAAGAATACTGTTCTTGCTCACACTTTTTCAGAAAGCTAGAAGACCTA
TTGGAGGGAGATCAGTGTGT
>E87o
AAGCACATTTTCATGACTCTTGGCTTTAAAAGCCTTATGGGGAAAGTTGAAATAYTTACAG
CTAGCTCAAAGAAGATTGAGAGAGGAAGCCTATTGGTTCTGATAGACTTCAGGAATTGGG
CTTGACATAGATTAAGAATACTGTTCTTGCTCACACTTTTTCAGAAAGCTAGAAGACCTA
TTGGAGGGAGATCAGTGTGT
>E7511o
AAGCACATTTTCATGACTCTTGGCTTTAAAAGCCTTATGGGGAAAGTTGAAATAYTTACAG
CTAGCTCAAAGAAGATTGAGAGAGGAAGCCTATTGGTTCTGATAGACTTCAGGAATTGGG
CTTGACATAGATTAAGAATACTGTTCTTGCTCACACTTTTTCAGAAAGCTAGAAGACCTA
TTGGAGGGAGATCAGTGTGT
```

CLUSTAL O(1.2.4) multiple sequence alignment

```
Off1      AAGCACATTTTCATGACTCTTGGCTTTAAAAGCCTTATGGGGAAAGTTGAAATACTTACAG
6Do       AAGCACATTTTCATGACTCTTGGCTTTAAAAGCCTTATGGGGAAAGTTGAAATAYTTACAG
6Dshao    AAGCACATTTTCATGACTCTTGGCTTTAAAAGCCTTATGGGGAAAGTTGAAATAYTTACAG
D13o      AAGCACATTTTCATGACTCTTGGCTTTAAAAGCCTTATGGGGAAAGTTGAAATAYTTACAG
D94o      AAGCACATTTTCATGACTCTTGGCTTTAAAAGCCTTATGGGGAAAGTTGAAATAYTTACAG
E87o      AAGCACATTTTCATGACTCTTGGCTTTAAAAGCCTTATGGGGAAAGTTGAAATAYTTACAG
E7511o    AAGCACATTTTCATGACTCTTGGCTTTAAAAGCCTTATGGGGAAAGTTGAAATAYTTACAG
          *****

Off1      CTAGCTCAAAGAAGATTGAGAGAGGAAGCCTATTGGTTCTGATAGACTTCAGGAATTGGG
6Do       CTAGCTCAAAGAAGATTGAGAGAGGAAGCCTATTGGTTCTGATAGACTTCAGGAATTGGG
6Dshao    CTAGCTCAAAGAAGATTGAGAGAGGAAGCCTATTGGTTCTGATAGACTTCAGGAATTGGG
D13o      CTAGCTCAAAGAAGATTGAGAGAGGAAGCCTATTGGTTCTGATAGACTTCAGGAATTGGG
D94o      CTAGCTCAAAGAAGATTGAGAGAGGAAGCCTATTGGTTCTGATAGACTTCAGGAATTGGG
E87o      CTAGCTCAAAGAAGATTGAGAGAGGAAGCCTATTGGTTCTGATAGACTTCAGGAATTGGG
E7511o    CTAGCTCAAAGAAGATTGAGAGAGGAAGCCTATTGGTTCTGATAGACTTCAGGAATTGGG
          *****

Off1      CTTGACATAGATTAAGAATACTGTTCTTGCTCACACTTTTTCAGAAAGCTAGAAGACCTA
6Do       CTTGACATAGATTAAGAATACTGTTCTTGCTCACACTTTTTCAGAAAGCTAGAAGACCTA
6Dshao    CTTGACATAGATTAAGAATACTGTTCTTGCTCACACTTTTTCAGAAAGCTAGAAGACCTA
D13o      CTTGACATAGATTAAGAATACTGTTCTTGCTCACACTTTTTCAGAAAGCTAGAAGACCTA
D94o      CTTGACATAGATTAAGAATACTGTTCTTGCTCACACTTTTTCAGAAAGCTAGAAGACCTA
E87o      CTTGACATAGATTAAGAATACTGTTCTTGCTCACACTTTTTCAGAAAGCTAGAAGACCTA
E7511o    CTTGACATAGATTAAGAATACTGTTCTTGCTCACACTTTTTCAGAAAGCTAGAAGACCTA
          *****

Off1      TTGGAGGGAGATCAGTGTGT
6Do       TTGGAGGGAGATCAGTGTGT
6Dshao    TTGGAGGGAGATCAGTGTGT
D13o      TTGGAGGGAGATCAGTGTGT
D94o      TTGGAGGGAGATCAGTGTGT
E87o      TTGGAGGGAGATCAGTGTGT
E7511o    TTGGAGGGAGATCAGTGTGT
          *****
```

**Off-target site nr. 2:** ACTTAGTCAGAGAAGATTGACAG score 1.3 4mm (1:4:5:10) **locus** chrx:-4100552

```
>Off2
TCTAGGTTCTG
TGTCCGTGTTAAGGAGTGAAAACCTCAGAGAAGATTGACAGATTGCAAGGTTTTCATT
CAGTTTCTGTTGTTTGCTTTTAAATATTACAGTAAGTTGGTTTCATACATCCGAGT
GACTGAGGATTCCCAATAATGTCAGGAAACCCACGCAATATCTGTGTTTGAACCTTC
TTTGTCAGAGCTCCATTTGGG
>6Do
TCTAGGTTCTGTGTCCTGTTAAGGAGTGAAAACCTTAGAGAAGATTGAC
AGATTGCAAGGTTTTTCATTACAGTTTCTGTTGTTTGCTTTTGCTTTAATATTACAGTAAGT
TGGTTTCATACATCCGAGTGACTGAGGATTCCCAATAATGTCAGGAAACCCACGCAATA
TCTGTGTTTGAACCTTCTTTGTCCAGAGCTCCATTTGGG
>6Dshao
TCTAGGTTCTGTGTCCTGTTAAGGAGTGAAAACCTTAGAGAAGATTGAC
AGATTGCAAGGTTTTTCATTACAGTTTCTGTTGTTTGCTTTTGCTTTAATATTACAGTAAGT
TGGTTTCATACATCCGAGTGACTGAGGATTCCCAATAATGTCAGGAAACCCACGCAATA
TCTGTGTTTGAACCTTCTTTGTCCAGAGCTCCATTTGGG
>D13o
TCTAGGTTCTGTGTCCTGTTAAGGAGTGAAAACCTTAGAGAAGATTGA
CAGATTGCAAGGTTTTTCATTACAGTTTCTGTTGTTTGCTTTTGCTTTAATATTACAGTAAG
TTGGTTTCATACATCCGAGTGACTGAGGATTCCCAATAATGTCAGGAAACCCACGCAAT
ATCTGTGTTTGAACCTTCTTTGTCCAGAGCTCCATTTGGG
>D94o
TCTAGGTTCTGTGTCCTGTTAAGGAGTGAAAACCTTAGAGAAGATTG
ACAGATTGCAAGGTTTTTCATTACAGTTTCTGTTGTTTGCTTTTGCTTTAATATTACAGTAA
GTTGGTTTCATACATCCGAGTGACTGAGGATTCCCAATAATGTCAGGAAACCCACGCAA
TATCTGTGTTTGAACCTTCTTTGTCCAGAGCTCCATTTGGG
>E87o
TCTAGGTTCTGTGTCCTGTTAAGGAGTGAAAACCTTAGAGAAGATTG
ACAGATTGCAAGGTTTTTCATTACAGTTTCTGTTGTTTGCTTTTGCTTTAATATTACAGTAA
GTTGGTTTCATACATCCGAGTGACTGAGGATTCCCAATAATGTCAGGAAACCCACGCAA
TATCTGTGTTTGAACCTTCTTTGTCCAGAGCTCCATTTGGG
>E7511o
TCTAGGTTCTGTGTCCTGTTAAGGAGTGAAAACCTTAGAGAAGATT
GACAGATTGCAAGGTTTTTCATTACAGTTTCTGTTGTTTGCTTTTGCTTTAATATTACAGTA
AGTTGGTTTCATACATCCGAGTGACTGAGGATTCCCAATAATGTCAGGAAACCCACGCA
ATATCTGTGTTTGAACCTTCTTTGTCCAGAGCTCCATTTGGG
```

CLUSTAL O(1.2.4) multiple sequence alignment

```
Off2      TCTAGGTTCTGTGTCCTGTTAAGGAGTGAAAACCTCAGAGAAGATTGACAGATTGCAAGGT
6Do       TCTAGGTTCTGTGTCCTGTTAAGGAGTGAAAACCTTAGAGAAGATTGACAGATTGCAAGGT
6Dshao    TCTAGGTTCTGTGTCCTGTTAAGGAGTGAAAACCTTAGAGAAGATTGACAGATTGCAAGGT
D13o      TCTAGGTTCTGTGTCCTGTTAAGGAGTGAAAACCTTAGAGAAGATTGACAGATTGCAAGGT
D94o      TCTAGGTTCTGTGTCCTGTTAAGGAGTGAAAACCTTAGAGAAGATTGACAGATTGCAAGGT
E87o      TCTAGGTTCTGTGTCCTGTTAAGGAGTGAAAACCTTAGAGAAGATTGACAGATTGCAAGGT
E7511o    TCTAGGTTCTGTGTCCTGTTAAGGAGTGAAAACCTTAGAGAAGATTGACAGATTGCAAGGT
*****
```

```
Off2      TTTCATTACAGTTTCTGTTGTTTGCTTTTGCTTTAATATTACAGTAAGTTGGTTTCATACA
6Do       TTTCATTACAGTTTCTGTTGTTTGCTTTTGCTTTAATATTACAGTAAGTTGGTTTCATACA
6Dshao    TTTCATTACAGTTTCTGTTGTTTGCTTTTGCTTTAATATTACAGTAAGTTGGTTTCATACA
D13o      TTTCATTACAGTTTCTGTTGTTTGCTTTTGCTTTAATATTACAGTAAGTTGGTTTCATACA
D94o      TTTCATTACAGTTTCTGTTGTTTGCTTTTGCTTTAATATTACAGTAAGTTGGTTTCATACA
E87o      TTTCATTACAGTTTCTGTTGTTTGCTTTTGCTTTAATATTACAGTAAGTTGGTTTCATACA
E7511o    TTTCATTACAGTTTCTGTTGTTTGCTTTTGCTTTAATATTACAGTAAGTTGGTTTCATACA
*****
```

```
Off2      TCCGAGTGACTGAGGATTCCCAATAATGTCAGGAAACCCACGCAATATCTGTGTTTGA
6Do       TCCGAGTGACTGAGGATTCCCAATAATGTCAGGAAACCCACGCAATATCTGTGTTTGA
6Dshao    TCCGAGTGACTGAGGATTCCCAATAATGTCAGGAAACCCACGCAATATCTGTGTTTGA
D13o      TCCGAGTGACTGAGGATTCCCAATAATGTCAGGAAACCCACGCAATATCTGTGTTTGA
D94o      TCCGAGTGACTGAGGATTCCCAATAATGTCAGGAAACCCACGCAATATCTGTGTTTGA
E87o      TCCGAGTGACTGAGGATTCCCAATAATGTCAGGAAACCCACGCAATATCTGTGTTTGA
E7511o    TCCGAGTGACTGAGGATTCCCAATAATGTCAGGAAACCCACGCAATATCTGTGTTTGA
*****
```

```
Off2      AACCTTCTTTGTCCAGAGCTCCATTTGGG
6Do       AACCTTCTTTGTCCAGAGCTCCATTTGGG
6Dshao    AACCTTCTTTGTCCAGAGCTCCATTTGGG
D13o      AACCTTCTTTGTCCAGAGCTCCATTTGGG
D94o      AACCTTCTTTGTCCAGAGCTCCATTTGGG
E87o      AACCTTCTTTGTCCAGAGCTCCATTTGGG
E7511o    AACCTTCTTTGTCCAGAGCTCCATTTGGG
*****
```

**Off-target site nr. 3:** CTTCAGTCATAGAAGATTGATAG score 1.3 4mm (2:4:5:10) **locus** chr8:-122232999

```
>Off3
TCAGATGATAGAGTTGCTGTAGAGCAATGAGGGAAGAGATATTCTTGCAGCTATATTAGG
AAGTCTATCTTCCACATAGAGATCCATTCTTATGAATTTGCCAGTCACGCTTGCCTCTGA
AATTACCCTCTGATTGATATTTCTGCTCAAGTCCTCAACATCATTGTT
>6Do
TCAGATGATAGAGTTGCTGTAGAGCAATGAGGGAAGAGATATTCTTGCAGCTATATTAGG
AAGTCTATCTTCCACATAGAGATCCATTCTTATGAATTTGCCAGTCACGCTTGCCTCTGA
AATTACCCTCTGATTGATATTTCTGCTCAAGTCCTCAACATCATTGTT
>6Dshao
TCAGATGATAGAGTTGCTGTAGAGCAATGAGGGAAGAGATATTCTTGCAGCTATATTAGG
AAGTCTATCTTCCACATAGAGATCCATTCTTATGAATTTGCCAGTCACGCTTGCCTCTGA
AATTACCCTCTGATTGATATTTCTGCTCAAGTCCTCAACATCATTGTT
>D13o
TCAGATGATAGAGTTGCTGTAGAGCAATGAGGGAAGAGATATTCTTGCAGCTATATTAGG
AAGTCTATCTTCCACATAGAGATCCATTCTTATGAATTTGCCAGTCACGCTTGCCTCTGA
AATTACCCTCTGATTGATATTTCTGCTCAAGTCCTCAACATCATTGTT
>D94o
TCAGATGATAGAGTTGCTGTAGAGCAATGAGGGAAGAGATATTCTTGCAGCTATATTAGG
AAGTCTATCTTCCACATAGAGATCCATTCTTATGAATTTGCCAGTCACGCTTGCCTCTGA
AATTACCCTCTGATTGATATTTCTGCTCAAGTCCTCAACATCATTGTT
>E87o
TCAGATGATAGAGTTGCTGTAGAGCAATGAGGGAAGAGATATTCTTGCAGCTATATTAGG
AAGTCTATCTTCCACATAGAGATCCATTCTTATGAATTTGCCAGTCACGCTTGCCTCTGA
AATTACCCTCTGATTGATATTTCTGCTCAAGTCCTCAACATCATTGTT
>E7511o
TCAGATGATAGAGTTGCTGTAGAGCAATGAGGGAAGAGATATTCTTGCAGCTATATTAGG
AAGTCTATCTTCCACATAGAGATCCATTCTTATGAATTTGCCAGTCACGCTTGCCTCTGA
AATTACCCTCTGATTGATATTTCTGCTCAAGTCCTCAACATCATTGTT
```

CLUSTAL O(1.2.4) multiple sequence alignment

|        |                                                              |     |
|--------|--------------------------------------------------------------|-----|
| Off3   | TCAGATGATAGAGTTGCTGTAGAGCAATGAGGGAAGAGATATTCTTGCAGCTATATTAGG | 60  |
| 6Do    | TCAGATGATAGAGTTGCTGTAGAGCAATGAGGGAAGAGATATTCTTGCAGCTATATTAGG | 60  |
| 6Dshao | TCAGATGATAGAGTTGCTGTAGAGCAATGAGGGAAGAGATATTCTTGCAGCTATATTAGG | 60  |
| D13o   | TCAGATGATAGAGTTGCTGTAGAGCAATGAGGGAAGAGATATTCTTGCAGCTATATTAGG | 60  |
| D94o   | TCAGATGATAGAGTTGCTGTAGAGCAATGAGGGAAGAGATATTCTTGCAGCTATATTAGG | 60  |
| E87o   | TCAGATGATAGAGTTGCTGTAGAGCAATGAGGGAAGAGATATTCTTGCAGCTATATTAGG | 60  |
| E7511o | TCAGATGATAGAGTTGCTGTAGAGCAATGAGGGAAGAGATATTCTTGCAGCTATATTAGG | 60  |
|        | *****                                                        |     |
| Off3   | AAGTCTATCTTCCACATAGAGATCCATTCTTATGAATTTGCCAGTCACGCTTGCCTCTGA | 120 |
| 6Do    | AAGTCTATCTTCCACATAGAGATCCATTCTTATGAATTTGCCAGTCACGCTTGCCTCTGA | 120 |
| 6Dshao | AAGTCTATCTTCCACATAGAGATCCATTCTTATGAATTTGCCAGTCACGCTTGCCTCTGA | 120 |
| D13o   | AAGTCTATCTTCCACATAGAGATCCATTCTTATGAATTTGCCAGTCACGCTTGCCTCTGA | 120 |
| D94o   | AAGTCTATCTTCCACATAGAGATCCATTCTTATGAATTTGCCAGTCACGCTTGCCTCTGA | 120 |
| E87o   | AAGTCTATCTTCCACATAGAGATCCATTCTTATGAATTTGCCAGTCACGCTTGCCTCTGA | 120 |
| E7511o | AAGTCTATCTTCCACATAGAGATCCATTCTTATGAATTTGCCAGTCACGCTTGCCTCTGA | 120 |
|        | *****                                                        |     |
| Off3   | AATTACCCTCTGATTGATATTTCTGCTCAAGTCCTCAACATCATTGTT             | 168 |
| 6Do    | AATTACCCTCTGATTGATATTTCTGCTCAAGTCCTCAACATCATTGTT             | 168 |
| 6Dshao | AATTACCCTCTGATTGATATTTCTGCTCAAGTCCTCAACATCATTGTT             | 168 |
| D13o   | AATTACCCTCTGATTGATATTTCTGCTCAAGTCCTCAACATCATTGTT             | 168 |
| D94o   | AATTACCCTCTGATTGATATTTCTGCTCAAGTCCTCAACATCATTGTT             | 168 |
| E87o   | AATTACCCTCTGATTGATATTTCTGCTCAAGTCCTCAACATCATTGTT             | 168 |
| E7511o | AATTACCCTCTGATTGATATTTCTGCTCAAGTCCTCAACATCATTGTT             | 168 |
|        | *****                                                        |     |

**Off-target site nr. 4:** TGTGGGTCAAAGAAGATTAAGGG score 1.1 3mm (1:2:19) **locus** chr2:+15179576  
>Off4

AGCTTCCTGTGCTAACAACCTCTAAGGCGCCTTCAGCTCAGAAACACCCTATGATTCAAA  
ATCCTCATAGAAAAAAGTCAGGGAAGGATTTAAAGAAATTGTTCCATATGATTTTTTCACA  
GGCTCGTCAGTGACTCTGTGTGGGTCAAAGAAGATTAAGGGCCTCTGGAAATTCAAAGGC  
TGATTACATCAAATCCTATCCCAGGAGCCAAGAAGGGAGTGTGCACCACAGCTCAATATT  
CTATGCACAAGCCAGGAGCTTTTAGATAAGCATTGTTGGGGGAGCTAACAGAAGG

>6Do

AGCTTCCTGTGCTAACAACCTCTAAGGCGCCTTCAGCTCAGAAACACCCTATGATTCAAA  
ATCCTCATAGAAAAAAGTCAGGGAAGGATTTAAAGAAATTGTTCCATATGATTTTTTCACA  
GGCTCGTCAGTGACTCTGTGTGGGTCAAAGAAGATTAAGGGCCTCTGGAAATTCAAAGGC  
TGATTACATCAAATCCTATCCCAGGAGCCAAGAAGGGAGTGTGCACCACAGCTCAATATT  
CTATGCACAAGCCAGGAGCTTTTAGATAAGCATTGTTGGGGGAGCTAACAGAAGG

>6Dshao

AGCTTCCTGTGCTAACAACCTCTAAGGCGCCTTCAGCTCAGAAACACCCTATGATTCAAA  
ATCCTCATAGAAAAAAGTCAGGGAAGGATTTAAAGAAATTGTTCCATATGATTTTTTCACA  
GGCTCGTCAGTGACTCTGTGTGGGTCAAAGAAGATTAAGGGCCTCTGGAAATTCAAAGGC  
TGATTACATCAAATCCTATCCCAGGAGCCAAGAAGGGAGTGTGCACCACAGCTCAATATT  
CTATGCACAAGCCAGGAGCTTTTAGATAAGCATTGTTGGGGGAGCTAACAGAAGG

>D13o

AGCTTCCTGTGCTAACAACCTCTAAGGCGCCTTCAGCTCAGAAACACCCTATGATTCAAA  
ATCCTCATAGAAAAAAGTCAGGGAAGGATTTAAAGAAATTGTTCCATATGATTTTTTCACA  
GGCTCGTCAGTGACTCTGTGTGGGTCAAAGAAGATTAAGGGCCTCTGGAAATTCAAAGGC  
TGATTACATCAAATCCTATCCCAGGAGCCAAGAAGGGAGTGTGCACCACAGCTCAATATT  
CTATGCACAAGCCAGGAGCTTTTAGATAAGCATTGTTGGGGGAGCTAACAGAAGG

>D94o

AGCTTCCTGTGCTAACAACCTCTAAGGCGCCTTCAGCTCAGAAACACCCTATGATTCAAA  
ATCCTCATAGAAAAAAGTCAGGGAAGGATTTAAAGAAATTGTTCCATATGATTTTTTCACA  
GGCTCGTCAGTGACTCTGTGTGGGTCAAAGAAGATTAAGGGCCTCTGGAAATTCAAAGGC  
TGATTACATCAAATCCTATCCCAGGAGCCAAGAAGGGAGTGTGCACCACAGCTCAATATT  
CTATGCACAAGCCAGGAGCTTTTAGATAAGCATTGTTGGGGGAGCTAACAGAAGG

>E87o

AGCTTCCTGTGCTAACAACCTCTAAGGCGCCTTCAGCTCAGAAACACCCTATGATTCAAA  
ATCCTCATAGAAAAAAGTCAGGGAAGGATTTAAAGAAATTGTTCCATATGATTTTTTCACA  
GGCTCGTCAGTGACTCTGTGTGGGTCAAAGAAGATTAAGGGCCTCTGGAAATTCAAAGGC  
TGATTACATCAAATCCTATCCCAGGAGCCAAGAAGGGAGTGTGCACCACAGCTCAATATT  
CTATGCACAAGCCAGGAGCTTTTAGATAAGCATTGTTGGGGGAGCTAACAGAAGG

>E7511o

AGCTTCCTGTGCTAACAACCTCTAAGGCGCCTTCAGCTCAGAAACACCCTATGATTCAAA  
ATCCTCATAGAAAAAAGTCAGGGAAGGATTTAAAGAAATTGTTCCATATGATTTTTTCACA  
GGCTCGTCAGTGACTCTGTGTGGGTCAAAGAAGATTAAGGGCCTCTGGAAATTCAAAGGC  
TGATTACATCAAATCCTATCCCAGGAGCCAAGAAGGGAGTGTGCACCACAGCTCAATATT  
CTATGCACAAGCCAGGAGCTTTTAGATAAGCATTGTTGGGGGAGCTAACAGAAGG

CLUSTAL O(1.2.4) multiple sequence alignment

|        |                                                              |
|--------|--------------------------------------------------------------|
| Off4   | AGCTTCCTGTGCTAACAACCTCTAAGGCGCCTTCAGCTCAGAAACACCCTATGATTCAAA |
| 6Do    | AGCTTCCTGTGCTAACAACCTCTAAGGCGCCTTCAGCTCAGAAACACCCTATGATTCAAA |
| 6Dshao | AGCTTCCTGTGCTAACAACCTCTAAGGCGCCTTCAGCTCAGAAACACCCTATGATTCAAA |
| D13o   | AGCTTCCTGTGCTAACAACCTCTAAGGCGCCTTCAGCTCAGAAACACCCTATGATTCAAA |
| D94o   | AGCTTCCTGTGCTAACAACCTCTAAGGCGCCTTCAGCTCAGAAACACCCTATGATTCAAA |
| E87o   | AGCTTCCTGTGCTAACAACCTCTAAGGCGCCTTCAGCTCAGAAACACCCTATGATTCAAA |
| E7511o | AGCTTCCTGTGCTAACAACCTCTAAGGCGCCTTCAGCTCAGAAACACCCTATGATTCAAA |
|        | *****                                                        |

|        |                                                               |
|--------|---------------------------------------------------------------|
| Off4   | ATCCTCATAGAAAAAAGTCAGGGAAGGATTTAAAGAAATTGTTCCATATGATTTTTTCACA |
| 6Do    | ATCCTCATAGAAAAAAGTCAGGGAAGGATTTAAAGAAATTGTTCCATATGATTTTTTCACA |
| 6Dshao | ATCCTCATAGAAAAAAGTCAGGGAAGGATTTAAAGAAATTGTTCCATATGATTTTTTCACA |
| D13o   | ATCCTCATAGAAAAAAGTCAGGGAAGGATTTAAAGAAATTGTTCCATATGATTTTTTCACA |
| D94o   | ATCCTCATAGAAAAAAGTCAGGGAAGGATTTAAAGAAATTGTTCCATATGATTTTTTCACA |
| E87o   | ATCCTCATAGAAAAAAGTCAGGGAAGGATTTAAAGAAATTGTTCCATATGATTTTTTCACA |
| E7511o | ATCCTCATAGAAAAAAGTCAGGGAAGGATTTAAAGAAATTGTTCCATATGATTTTTTCACA |
|        | *****                                                         |

|        |                                                              |
|--------|--------------------------------------------------------------|
| Off4   | GGCTCGTCAGTGACTCTGTGTGGGTCAAAGAAGATTAAGGGCCTCTGGAAATTCAAAGGC |
| 6Do    | GGCTCGTCAGTGACTCTGTGTGGGTCAAAGAAGATTAAGGGCCTCTGGAAATTCAAAGGC |
| 6Dshao | GGCTCGTCAGTGACTCTGTGTGGGTCAAAGAAGATTAAGGGCCTCTGGAAATTCAAAGGC |
| D13o   | GGCTCGTCAGTGACTCTGTGTGGGTCAAAGAAGATTAAGGGCCTCTGGAAATTCAAAGGC |
| D94o   | GGCTCGTCAGTGACTCTGTGTGGGTCAAAGAAGATTAAGGGCCTCTGGAAATTCAAAGGC |



```
E87o      GGCTCGTCAGTGA CTCTGTGTGGGTCAAAGAAGATTAAGGGCCTCTGGAAATTCAAAGGC
E7511o    GGCTCGTCAGTGA CTCTGTGTGGGTCAAAGAAGATTAAGGGCCTCTGGAAATTCAAAGGC
*****
```

```
Off4      TGATTACATCAAATCCTATCCCAGGAGCCAAGAAGGGAGTGTGCACCACAGCTCAATATT
6Do       TGATTACATCAAATCCTATCCCAGGAGCCAAGAAGGGAGTGTGCACCACAGCTCAATATT
6Dshao    TGATTACATCAAATCCTATCCCAGGAGCCAAGAAGGGAGTGTGCACCACAGCTCAATATT
D13o      TGATTACATCAAATCCTATCCCAGGAGCCAAGAAGGGAGTGTGCACCACAGCTCAATATT
D94o      TGATTACATCAAATCCTATCCCAGGAGCCAAGAAGGGAGTGTGCACCACAGCTCAATATT
E87o      TGATTACATCAAATCCTATCCCAGGAGCCAAGAAGGGAGTGTGCACCACAGCTCAATATT
E7511o    TGATTACATCAAATCCTATCCCAGGAGCCAAGAAGGGAGTGTGCACCACAGCTCAATATT
*****
```

```
Off4      CTATGCACAAGCCAGGAGCTTTTAGATAAGCATTTTGGGGGAGCTAACAGAAGG
6Do       CTATGCACAAGCCAGGAGCTTTTAGATAAGCATTTTGGGGGAGCTAACAGAAGG
6Dshao    CTATGCACAAGCCAGGAGCTTTTAGATAAGCATTTTGGGGGAGCTAACAGAAGG
D13o      CTATGCACAAGCCAGGAGCTTTTAGATAAGCATTTTGGGGGAGCTAACAGAAGG
D94o      CTATGCACAAGCCAGGAGCTTTTAGATAAGCATTTTGGGGGAGCTAACAGAAGG
E87o      CTATGCACAAGCCAGGAGCTTTTAGATAAGCATTTTGGGGGAGCTAACAGAAGG
E7511o    CTATGCACAAGCCAGGAGCTTTTAGATAAGCATTTTGGGGGAGCTAACAGAAGG
*****
```

**Off-target site nr. 5:** CATGGGGCCAAGAAGATTGACAG score 1.1 3mm (2:7:9) **locus** chr15:-48163869

```
>Off5
ATGTCACAGAGATGAAGGGTGCTGAGATGCTGGTGGGAAGTAGTTCATGGGGCCAAGAAG
ATTGACAGAACGATCTGAGGTTTCTTTTAAGCTTTGCTGGCATGTCACTGTCATCACAGG
ATAGAGAAAAC TTGCATTACACGTCCTATCAGACTGGAGCTAGGAAAAC TGCACCATG
GTTAGATGG
>6Do
ATGTCACAGAGATGAAGGGTGCTGAGATGCTGGTGGGAAGTAGTTCATGGGGCCAAGAAG
ATTGACAGAACGATCTGAGGTTTCTTTTAAGCTTTGCTGGCATGTCACTGTCATCACAGG
ATAGAGAAAAC TTGCATTACACGTCCTATCAGACTGGAGCTAGGAAAAC TGCACCATG
GTTAGATGG
>6Dshao
ATGTCACAGAGATGAAGGGTGCTGAGATGCTGGTGGGAAGTAGTTCATGGGGCCAAGAAG
ATTGACAGAACGATCTGAGGTTTCTTTTAAGCTTTGCTGGCATGTCACTGTCATCACAGG
ATAGAGAAAAC TTGCATTACACGTCCTATCAGACTGGAGCTAGGAAAAC TGCACCATG
GTTAGATGG
>D13o
ATGTCACAGAGATGAAGGGTGCTGAGATGCTGGTGGGAAGTAGTTCATGGGGCCAAGAAG
ATTGACAGAACGATCTGAGGTTTCTTTTAAGCTTTGCTGGCATGTCACTGTCATCACAGG
ATAGAGAAAAC TTGCATTACACGTCCTATCAGACTGGAGCTAGGAAAAC TGCACCATG
GTTAGATGG
>D94o
ATGTCACAGAGATGAAGGGTGCTGAGATGCTGGTGGGAAGTAGTTCATGGGGCCAAGAAG
ATTGACAGAACGATCTGAGGTTTCTTTTAAGCTTTGCTGGCATGTCACTGTCATCACAGG
ATAGAGAAAAC TTGCATTACACGTCCTATCAGACTGGAGCTAGGAAAAC TGCACCATG
GTTAGATGG
>E87o
ATGTCACAGAGATGAAGGGTGCTGAGATGCTGGTGGGAAGTAGTTCATGGGGCCAAGAAG
ATTGACAGAACGATCTGAGGTTTCTTTTAAGCTTTGCTGGCATGTCACTGTCATCACAGG
ATAGAGAAAAC TTGCATTACACGTCCTATCAGACTGGAGCTAGGAAAAC TGCACCATG
GTTAGATGG
>E7511o
ATGTCACAGAGATGAAGGGTGCTGAGATGCTGGTGGGAAGTAGTTCATGGGGCCAAGAAG
ATTGACAGAACGATCTGAGGTTTCTTTTAAGCTTTGCTGGCATGTCACTGTCATCACAGG
ATAGAGAAAAC TTGCATTACACGTCCTATCAGACTGGAGCTAGGAAAAC TGCACCATG
GTTAGATGG
```

CLUSTAL O(1.2.4) multiple sequence alignment

```
Off5      ATGTCACAGAGATGAAGGGTGCTGAGATGCTGGTGGGAAGTAGTTCATGGGGCCAAGAAG
6Do       ATGTCACAGAGATGAAGGGTGCTGAGATGCTGGTGGGAAGTAGTTCATGGGGCCAAGAAG
6Dshao    ATGTCACAGAGATGAAGGGTGCTGAGATGCTGGTGGGAAGTAGTTCATGGGGCCAAGAAG
D13o      ATGTCACAGAGATGAAGGGTGCTGAGATGCTGGTGGGAAGTAGTTCATGGGGCCAAGAAG
D94o      ATGTCACAGAGATGAAGGGTGCTGAGATGCTGGTGGGAAGTAGTTCATGGGGCCAAGAAG
E87o      ATGTCACAGAGATGAAGGGTGCTGAGATGCTGGTGGGAAGTAGTTCATGGGGCCAAGAAG
E7511o    ATGTCACAGAGATGAAGGGTGCTGAGATGCTGGTGGGAAGTAGTTCATGGGGCCAAGAAG
*****
```

```
Off5      ATTGACAGAACGATCTGAGGTTTCTTTTAAGCTTTGCTGGCATGTCACTGTCATCACAGG
6Do       ATTGACAGAACGATCTGAGGTTTCTTTTAAGCTTTGCTGGCATGTCACTGTCATCACAGG
```

6Dshao       ATTGACAGAACGATCTGAGGTTTCTTTTAAGCTTTGCTGGCATGTCACTGTCATCACAGG  
D13o         ATTGACAGAACGATCTGAGGTTTCTTTTAAGCTTTGCTGGCATGTCACTGTCATCACAGG  
D94o         ATTGACAGAACGATCTGAGGTTTCTTTTAAGCTTTGCTGGCATGTCACTGTCATCACAGG  
E87o         ATTGACAGAACGATCTGAGGTTTCTTTTAAGCTTTGCTGGCATGTCACTGTCATCACAGG  
E7511o       ATTGACAGAACGATCTGAGGTTTCTTTTAAGCTTTGCTGGCATGTCACTGTCATCACAGG  
\*\*\*\*\*

Off5         ATAGAGAAAACCTGCATTACACGTCCTATCAGACTGGAGCTAGGAAAACCTGTCACCATG  
6Do         ATAGAGAAAACCTGCATTACACGTCCTATCAGACTGGAGCTAGGAAAACCTGTCACCATG  
6Dshao       ATAGAGAAAACCTGCATTACACGTCCTATCAGACTGGAGCTAGGAAAACCTGTCACCATG  
D13o         ATAGAGAAAACCTGCATTACACGTCCTATCAGACTGGAGCTAGGAAAACCTGTCACCATG  
D94o         ATAGAGAAAACCTGCATTACACGTCCTATCAGACTGGAGCTAGGAAAACCTGTCACCATG  
E87o         ATAGAGAAAACCTGCATTACACGTCCTATCAGACTGGAGCTAGGAAAACCTGTCACCATG  
E7511o       ATAGAGAAAACCTGCATTACACGTCCTATCAGACTGGAGCTAGGAAAACCTGTCACCATG  
\*\*\*\*\*

Off5         GTTAGATGG  
6Do         GTTAGATGG  
6Dshao       GTTAGATGG  
D13o         GTTAGATGG  
D94o         GTTAGATGG  
E87o         GTTAGATGG  
E7511o       GTTAGATGG  
\*\*\*\*\*

**Off-target site nr. 6:** CCTGGGTAAGAGAAGAGTGACAG score 1.0 3mm (8:10:17) **locus** chr10:+3236153

>Off6  
AGCTGGTTTCTTTCACTTGCTGCCCCAACTCCTGAAGATATAAAGTCAAAAGGCAAATGC  
CATTTGACTGGACTACCTTCTAGCTATAGTTTGTGACAAACCACTTTTGTGTAGAAGGGC  
TACCCCTCCAGTAACCTTCCCTCACTTTGTAGTTTTCGGGTGCCTGGTGTGTCCTGGGTA  
AGAGAAGAGTGACAGCAGCTGGTTTGAATGACGCTTTCTTAGTGGACGCCATGGACATGG  
TGTCCATGAGCACCACAGAGTAAACTAAGGGACCTCTCATGTCCACCCAAAGGTGTGTTA  
CTGCACAGAGGTTTATGCAATGCGGCTTTGCATCACCA  
>6Do  
AGCTGGTTTCTTTCACTTGCTGCCCCAACTCCTGAAGATATAAAGTCAAAAGGCAAATGC  
CATTTGACTGGACTACCTTCTAGCTATAGTTTGTGACAAACCACTTTTGTGTAGAAGGGC  
TACCCCTCCAGTAACCTTCCCTCACTTTGTAGTTTTCGGGTGCCTGGTGTGTCCTGGGTA  
AGAGAAGAGTGACAGCAGCTGGTTTGAATGACGCTTTCTTAGTGGACGCCATGGACATGG  
TGTCCATGAGCACCACAGAGTAAACTAAGGGACCTCTCATGTCCACCCAAAGGTGTGTTA  
CTGCACAGAGGTTTATGCAATGCGGCTTTGCATCACCA  
>6Dshao  
AGCTGGTTTCTTTCACTTGCTGCCCCAACTCCTGAAGATATAAAGTCAAAAGGCAAATGC  
CATTTGACTGGACTACCTTCTAGCTATAGTTTGTGACAAACCACTTTTGTGTAGAAGGGC  
TACCCCTCCAGTAACCTTCCCTCACTTTGTAGTTTTCGGGTGCCTGGTGTGTCCTGGGTA  
AGAGAAGAGTGACAGCAGCTGGTTTGAATGACGCTTTCTTAGTGGACGCCATGGACATGG  
TGTCCATGAGCACCACAGAGTAAACTAAGGGACCTCTCATGTCCACCCAAAGGTGTGTTA  
CTGCACAGAGGTTTATGCAATGCGGCTTTGCATCACCA  
>D13o  
AGCTGGTTTCTTTCACTTGCTGCCCCAACTCCTGAAGATATAAAGTCAAAAGGCAAATGC  
CATTTGACTGGACTACCTTCTAGCTATAGTTTGTGACAAACCACTTTTGTGTAGAAGGGC  
TACCCCTCCAGTAACCTTCCCTCACTTTGTAGTTTTCGGGTGCCTGGTGTGTCCTGGGTA  
AGAGAAGAGTGACAGCAGCTGGTTTGAATGACGCTTTCTTAGTGGACGCCATGGACATGG  
TGTCCATGAGCACCACAGAGTAAACTAAGGGACCTCTCATGTCCACCCAAAGGTGTGTTA  
CTGCACAGAGGTTTATGCAATGCGGCTTTGCATCACCA  
>D94o  
AGCTGGTTTCTTTCACTTGCTGCCCCAACTCCTGAAGATATAAAGTCAAAAGGCAAATGC  
CATTTGACTGGACTACCTTCTAGCTATAGTTTGTGACAAACCACTTTTGTGTAGAAGGGC  
TACCCCTCCAGTAACCTTCCCTCACTTTGTAGTTTTCGGGTGCCTGGTGTGTCCTGGGTA  
AGAGAAGAGTGACAGCAGCTGGTTTGAATGACGCTTTCTTAGTGGACGCCATGGACATGG  
TGTCCATGAGCACCACAGAGTAAACTAAGGGACCTCTCATGTCCACCCAAAGGTGTGTTA  
CTGCACAGAGGTTTATGCAATGCGGCTTTGCATCACCA  
>E87o  
AGCTGGTTTCTTTCACTTGCTGCCCCAACTCCTGAAGATATAAAGTCAAAAGGCAAATGC  
CATTTGACTGGACTACCTTCTAGCTATAGTTTGTGACAAACCACTTTTGTGTAGAAGGGC  
TACCCCTCCAGTAACCTTCCCTCACTTTGTAGTTTTCGGGTGCCTGGTGTGTCCTGGGTA  
AGAGAAGAGTGACAGCAGCTGGTTTGAATGACGCTTTCTTAGTGGACGCCATGGACATGG  
TGTCCATGAGCACCACAGAGTAAACTAAGGGACCTCTCATGTCCACCCAAAGGTGTGTTA  
CTGCACAGAGGTTTATGCAATGCGGCTTTGCATCACCA  
>E7511o  
AGCTGGTTTCTTTCACTTGCTGCCCCAACTCCTGAAGATATAAAGTCAAAAGGCAAATGC  
CATTTGACTGGACTACCTTCTAGCTATAGTTTGTGACAAACCACTTTTGTGTAGAAGGGC  
TACCCCTCCAGTAACCTTCCCTCACTTTGTAGTTTTCGGGTGCCTGGTGTGTCCTGGGTA  
AGAGAAGAGTGACAGCAGCTGGTTTGAATGACGCTTTCTTAGTGGACGCCATGGACATGG  
TGTCCATGAGCACCACAGAGTAAACTAAGGGACCTCTCATGTCCACCCAAAGGTGTGTTA  
CTGCACAGAGGTTTATGCAATGCGGCTTTGCATCACCA

CLUSTAL O(1.2.4) multiple sequence alignment

|        |                                                              |     |
|--------|--------------------------------------------------------------|-----|
| Off6   | AGCTGGTTTCTTTCACTTGCTGCCCCAACTCCTGAAGATATAAAAGTCAAAGGCAAATGC | 60  |
| 6Do    | AGCTGGTTTCTTTCACTTGCTGCCCCAACTCCTGAAGATATAAAAGTCAAAGGCAAATGC | 60  |
| 6Dshao | AGCTGGTTTCTTTCACTTGCTGCCCCAACTCCTGAAGATATAAAAGTCAAAGGCAAATGC | 60  |
| D13o   | AGCTGGTTTCTTTCACTTGCTGCCCCAACTCCTGAAGATATAAAAGTCAAAGGCAAATGC | 60  |
| D94o   | AGCTGGTTTCTTTCACTTGCTGCCCCAACTCCTGAAGATATAAAAGTCAAAGGCAAATGC | 60  |
| E87o   | AGCTGGTTTCTTTCACTTGCTGCCCCAACTCCTGAAGATATAAAAGTCAAAGGCAAATGC | 60  |
| E7511o | AGCTGGTTTCTTTCACTTGCTGCCCCAACTCCTGAAGATATAAAAGTCAAAGGCAAATGC | 60  |
| *****  |                                                              |     |
| Off6   | CATTTGACTGGACTACCTTCTAGCTATAGTTTTGACAAACCACTTTTTGTGTAGAAGGGC | 120 |
| 6Do    | CATTTGACTGGACTACCTTCTAGCTATAGTTTTGACAAACCACTTTTTGTGTAGAAGGGC | 120 |
| 6Dshao | CATTTGACTGGACTACCTTCTAGCTATAGTTTTGACAAACCACTTTTTGTGTAGAAGGGC | 120 |
| D13o   | CATTTGACTGGACTACCTTCTAGCTATAGTTTTGACAAACCACTTTTTGTGTAGAAGGGC | 120 |
| D94o   | CATTTGACTGGACTACCTTCTAGCTATAGTTTTGACAAACCACTTTTTGTGTAGAAGGGC | 120 |
| E87o   | CATTTGACTGGACTACCTTCTAGCTATAGTTTTGACAAACCACTTTTTGTGTAGAAGGGC | 120 |
| E7511o | CATTTGACTGGACTACCTTCTAGCTATAGTTTTGACAAACCACTTTTTGTGTAGAAGGGC | 120 |
| *****  |                                                              |     |
| Off6   | TACCCCTCCAGTAACCTTCCCTCACTTTGTAGTTTTCGGGTGCCTGGTGTGTCCTGGGTA | 180 |
| 6Do    | TACCCCTCCAGTAACCTTCCCTCACTTTGTAGTTTTCGGGTGCCTGGTGTGTCCTGGGTA | 180 |
| 6Dshao | TACCCCTCCAGTAACCTTCCCTCACTTTGTAGTTTTCGGGTGCCTGGTGTGTCCTGGGTA | 180 |
| D13o   | TACCCCTCCAGTAACCTTCCCTCACTTTGTAGTTTTCGGGTGCCTGGTGTGTCCTGGGTA | 180 |
| D94o   | TACCCCTCCAGTAACCTTCCCTCACTTTGTAGTTTTCGGGTGCCTGGTGTGTCCTGGGTA | 180 |
| E87o   | TACCCCTCCAGTAACCTTCCCTCACTTTGTAGTTTTCGGGTGCCTGGTGTGTCCTGGGTA | 180 |
| E7511o | TACCCCTCCAGTAACCTTCCCTCACTTTGTAGTTTTCGGGTGCCTGGTGTGTCCTGGGTA | 180 |
| *****  |                                                              |     |
| Off6   | AGAGAAGAGTGACAGCAGCTGGTTTGAATGACGCTTCTTAGTGGACGCCATGGACATGG  | 240 |
| 6Do    | AGAGAAGAGTGACAGCAGCTGGTTTGAATGACGCTTCTTAGTGGACGCCATGGACATGG  | 240 |
| 6Dshao | AGAGAAGAGTGACAGCAGCTGGTTTGAATGACGCTTCTTAGTGGACGCCATGGACATGG  | 240 |
| D13o   | AGAGAAGAGTGACAGCAGCTGGTTTGAATGACGCTTCTTAGTGGACGCCATGGACATGG  | 240 |
| D94o   | AGAGAAGAGTGACAGCAGCTGGTTTGAATGACGCTTCTTAGTGGACGCCATGGACATGG  | 240 |
| E87o   | AGAGAAGAGTGACAGCAGCTGGTTTGAATGACGCTTCTTAGTGGACGCCATGGACATGG  | 240 |
| E7511o | AGAGAAGAGTGACAGCAGCTGGTTTGAATGACGCTTCTTAGTGGACGCCATGGACATGG  | 240 |
| *****  |                                                              |     |
| Off6   | TGTCCATGAGCACCACAGAGTAACTAAGGGACCTCTCATGTCCACCCAAAGGTGTGTTA  | 300 |
| 6Do    | TGTCCATGAGCACCACAGAGTAACTAAGGGACCTCTCATGTCCACCCAAAGGTGTGTTA  | 300 |
| 6Dshao | TGTCCATGAGCACCACAGAGTAACTAAGGGACCTCTCATGTCCACCCAAAGGTGTGTTA  | 300 |
| D13o   | TGTCCATGAGCACCACAGAGTAACTAAGGGACCTCTCATGTCCACCCAAAGGTGTGTTA  | 300 |
| D94o   | TGTCCATGAGCACCACAGAGTAACTAAGGGACCTCTCATGTCCACCCAAAGGTGTGTTA  | 300 |
| E87o   | TGTCCATGAGCACCACAGAGTAACTAAGGGACCTCTCATGTCCACCCAAAGGTGTGTTA  | 300 |
| E7511o | TGTCCATGAGCACCACAGAGTAACTAAGGGACCTCTCATGTCCACCCAAAGGTGTGTTA  | 300 |
| *****  |                                                              |     |
| Off6   | CTGCACAGAGGTTTATGCAATGCGGCTTTGCATCACCA 338                   |     |
| 6Do    | CTGCACAGAGGTTTATGCAATGCGGCTTTGCATCACCA 338                   |     |
| 6Dshao | CTGCACAGAGGTTTATGCAATGCGGCTTTGCATCACCA 338                   |     |
| D13o   | CTGCACAGAGGTTTATGCAATGCGGCTTTGCATCACCA 338                   |     |
| D94o   | CTGCACAGAGGTTTATGCAATGCGGCTTTGCATCACCA 338                   |     |
| E87o   | CTGCACAGAGGTTTATGCAATGCGGCTTTGCATCACCA 338                   |     |
| E7511o | CTGCACAGAGGTTTATGCAATGCGGCTTTGCATCACCA 338                   |     |
| *****  |                                                              |     |
